1

2

KOONTZ ET AL.: POPULATION DIVISIONS IN THE *PRIMULA CUSICKIANA*

3

SPECIES COMPLEX

4

5

6

7

8

**Pronounced Genetic Separation Among Varieties of the *Primula cusickiana* Species**

9

**Complex, a Great Basin Endemic**

10

11

12

**Austin Koontz,<sup>1,4</sup> William D. Pearse,<sup>2</sup> and Paul Wolf<sup>3</sup>**

13

14

<sup>1</sup>Department of Biology, Utah State University, Logan, Utah, 84322, USA;

15

austin.koontz@usu.edu

16

17

<sup>2</sup>Department of Life Sciences, Imperial College London, Silwood Park Campus,

18

Buckhurst Rd., Ascot, Berkshire SL5 7PY, UK

19

20

<sup>3</sup>Department of Biological Sciences, University of Alabama in Huntsville, Huntsville,

21

Alabama, 35899, USA

22

23

<sup>4</sup>Author for correspondence

24           **Abstract**—Distinguishing between unique species and populations with  
25 strong genetic structure is a common challenge in population genetics, especially in  
26 fragmented habitats where allopatric speciation may be widespread and distinct  
27 groups may be morphologically similar. Such is often the case with species  
28 complexes across sky island environments. In these scenarios, biogeography may  
29 help to explain the relations between species complex members, and RADseq  
30 methods are commonly used to compare closely related species across thousands of  
31 genetic loci. Here we use RADseq to clarify the relations between geographically  
32 distinct but morphologically similar varieties of the *Primula cusickiana* species  
33 complex, and to contextualize past findings of strong genetic structure among  
34 populations within varieties. Our genomic analyses demonstrate pronounced  
35 separation between isolated populations of this Great Basin endemic, indicating that  
36 the current varietal classification of complex members is inaccurate and  
37 emphasizing their conservation importance. We discuss how these results  
38 correspond to recent biogeographical models used to describe the distribution of  
39 other sky island taxa in western North America. Our findings also fit into a wider  
40 trend observed for alpine *Primula* species complexes, and we consider how  
41 heterostylous breeding systems may be contributing to frequent diversification via  
42 allopatric speciation in this genus.

43           **Keywords**— allopatry, biogeography, cryptic speciation, Great Basin,  
44 heterostyly, populations, *Primula*, RADseq, sky island

45

46

47           A canonical driver of biological diversification is allopatry, whereby geographic  
48 barriers lead to population isolation and, eventually, speciation. Sky islands are places  
49 where sharp changes in elevation lead to pronounced ecological differences over  
50 relatively short distances, providing the types of barriers required for allopatric speciation  
51 to take place. Historically, climatic fluctuations have determined the presence and  
52 distribution of sky island environments for mountain ranges across the world, and this in  
53 turn is reflected by the genetic patterns seen in montane species today (Hewitt 2000).  
54 However, in this biogeographic context, distinguishing between closely related species  
55 and genetically structured populations may prove challenging (Huang 2020), especially if  
56 similar niches across mountain ranges maintain phenotypic similarities (e.g. Yang et al.  
57 2019). Additionally, in the short-term, genetic patterns will be influenced by particular  
58 aspects of a species' biology, such as dispersal and breeding systems, which may  
59 facilitate or hinder reproductive isolation between genetically distinct entities. Here, we  
60 examine the genomic relations between the sky island populations of members of the  
61 *Primula cusickiana* species complex, a group of plants endemic to the Great Basin region  
62 of the western United States.

63           The *P. cusickiana* species complex is a group of herbaceous, perennial plants that  
64 fall within the Parryi section of *Primula*. The morphological differences between the four  
65 complex varieties—*maguirei*, *cusickiana*, *nevadensis*, and *domensis* (see Fig. 1)—are  
66 subtle: *maguirei* (Williams 1936) and *cusickiana* (Gray 1888) are entirely glabrous, and  
67 distinguished from one another by relative calyx length, while in *nevadensis* (Holmgren  
68 1967) and *domensis* (Kass and Welsh 1985), plants are pubescent and have slightly  
69 different corolla tube lengths (Holmgren and Kelso 2001; Holmgren et al. 2005). Despite

70 these subtle differences, varieties *cusickiana*, *nevadensis*, and *maguirei* were originally  
71 classified as separate species, based on ecological traits and distinct geographic ranges.  
72 The discovery and publication of *P. domensis* in 1985, along with the continued  
73 collection of the other varieties, began to cast doubt on the species distinction for each  
74 complex member. A 2001 review determined that the morphological differences were  
75 insufficient for species classification, and subsumed each species to the level of variety  
76 (Holmgren and Kelso 2001).

77         At the time of this shift, no genetic data was available to justify classification at  
78 the variety level. However, a 1997 analysis of variety *maguirei* used allozyme marker  
79 genes to uncover a significant degree of genetic structure between the relatively  
80 proximate (~10 km) populations (Wolf and Sinclair 1997) within this one taxon. A later  
81 analysis of the same populations using amplified fragment length polymorphism (AFLP)  
82 loci confirmed this finding, and found similar levels of polymorphism between the upper  
83 and lower canyon groups, suggesting this genetic structure is not the result of a past  
84 bottleneck event (Bjerregaard and Wolf 2004). A further analysis of AFLP and  
85 chloroplast DNA from the *Primula* section *Parryi* showed *maguirei* and the other *P.*  
86 *cusickiana* complex members as being monophyletic, but relationships within the  
87 complex were incongruent, with only weak support of a clade containing *nevadensis* and  
88 *domensis* being sister to a clade made up of *maguirei* and *cusickiana* (Kelso et al. 2009).  
89 To better resolve the relationships between varieties, the authors suggested an analysis  
90 utilizing more populations from across the range of this species complex. Restriction-site  
91 associated sequencing (RADseq) technologies available today, with their ability to  
92 generate reads over many sequence regions of closely related individuals, are well-suited

93 to provide the data required for such an analysis.

94           In addition to clarifying the genetic relations between geographically distinct  
95 varieties, a more detailed analysis of the *P. cusickiana* species complex can meaningfully  
96 contribute to ongoing conservation efforts. Variety *maguirei* was listed as Threatened in  
97 1985, due to its unique habitat in Logan Canyon and threats of habitat loss due to  
98 development (Fish and Wildlife Service 1985). Given the strong genetic structure  
99 between *maguirei*'s populations, either population may be more closely related to  
100 populations of a different complex variety than the neighboring Logan Canyon  
101 population—a finding which would have significant implications for the protection of  
102 this variety. More broadly, an understanding of the genomic relations at the species  
103 complex level will determine whether the varietal classification properly reflects the  
104 extent of genomic divergence of each complex member, and thus the extent of unique  
105 evolutionary history. This understanding can direct management of the narrow-range  
106 endemics included in this species complex—such as *maguirei*, but also *nevadensis* and  
107 *domensis*—and also inform the identification of potential evolutionary significant units  
108 (Coates et al. 2018).

109           We sought to clarify the relatedness of *P. cusickiana* complex members by using  
110 a RADseq approach to genotype all four varieties located at distinct populations scattered  
111 throughout the Great Basin. In addition to contextualizing the genetic structure between  
112 the upper and lower Logan Canyon *maguirei* populations, this analysis provides insights  
113 into the biogeographic history of this species complex, and could have important  
114 conservation implications for this rare endemic plant.

115

116

## MATERIALS AND METHODS

117

118

119

120

121

122

123

124

125

126

127

128

129

130

131

132

133

134

135

136

137

138

**Sampling**—All *P. cusickiana* species complex samples were gathered in the field, along with samples of *P. parryi* (Gray 1888), which was used as an outgroup in genetic analyses. Populations and their respective flowering times were determined using herbarium specimens, and collection sites were selected to maximize the geographic distribution of each variety. At each population location, an individual plant was removed as completely as possible as a voucher specimen. For DNA samples, two leaves from each of ten plants were removed and placed in labeled paper envelopes, which were stored on silica crystals to keep samples dry. Vouchers were deposited at the Intermountain Herbarium (UTC); *P. cusickiana* var. *nevadensis* voucher specimens collected from Mt. Washington were additionally deposited at the Great Basin National Park herbarium.

Because past research has shown variable relations between *P. capillaris* (Holmgren and Holmgren 1974) and the *P. cusickiana* species complex (Kelso et al. 2009), we also tried to collect *P. capillaris* in the field. However, we were unable to locate any *P. capillaris* individuals in the Ruby Mountains: at one location suggested by past herbaria data, a population of *P. parryi* was found instead. To compensate, two *P. capillaris* samples were sourced from herbaria (see Appendix I).

Leaf tissue from 89 samples—87 silica-dried field collections representing all samples sites, and two herbarium specimens of *P. capillaris*—were placed into QIGAEN Collection Microtubes (catalog number 19560) and sent to University of Wisconsin-Madison Biotechnology Center, for DNA extraction, library prep, and DNA sequencing (described below). Seven replicate samples were also included to

139 assess the quality of sequencing results, and were distributed across all four *P.*  
140 *cusickiana* varieties, as well as *P. parryi*.

141 **DNA Extraction**—DNA was extracted using the QIAGEN Dneasy mericon 96  
142 QIAcube HT Kit. DNA was quantified using the Quant-iT™ PicoGreenR® dsDNA kit  
143 (Life Technologies, Grand Island, New York).

144 **Library Prep and Sequencing**—Libraries were prepared following Elshire et al.  
145 2011. *ApeKI* (New England Biolabs, Ipswich, Massachusetts) was used to digest 100 ng  
146 of DNA. Following digestion, Illumina adapter barcodes were ligated onto DNA  
147 fragments using T4 ligase (New England Biolabs, Ipswich, Massachusetts). Size  
148 selection was run on a PippinHT (Sage Science, Inc., Beverly, Massachusetts) to subset  
149 samples down to 300—450 bp fragments, after which samples were purified using a  
150 SPRI bead cleanup. To generate quantities required for sequencing, adapter-ligated  
151 samples were pooled and then amplified, and a post-amplification SPRI bead cleanup  
152 step was run to remove adapter dimers. Final library qualities were assessed using the  
153 Agilent 2100 Bioanalyzer and High Sensitivity Chip (Agilent Technologies, Inc., Santa  
154 Clara, California), and concentrations were determined using the Qubit® dsDNA HS  
155 Assay Kit (Life Technologies, Grand Island, New York). Libraries were sequenced on an  
156 Illumina NovaSeq 6000 2x150.

157 **Data Processing**—Raw FASTQ data files were demultiplexed and processed  
158 using steps 1—7 of the *ipyrad* software, version 0.9.31 (Eaton and Overcast 2020).  
159 Single nucleotide polymorphisms (SNPs) recognized by *ipyrad* were used as the basis for  
160 variation between individuals for downstream analyses, and libraries were assembled *de*  
161 *novo*. All *ipyrad* and STRUCTURE parameter files, as well as R scripts used for analysis

162 and data visualization, can be found on GitHub ([github.com/akoontz11/Primula/](https://github.com/akoontz11/Primula/)) and in  
163 the Supplementary Materials (SupplementalMaterials1.zip). Raw, demultiplexed  
164 sequencing data can be accessed on the NCBI Sequence Read Archive (SRA; accession  
165 number PRJNA705310).

166       COMPLEX-WIDE GENOMIC SURVEY—For our complex-wide genomic survey, we  
167 ran *ipyrad* twice: we used the results from our initial run to confirm sequencing  
168 consistency for replicate samples, and to identify samples with low coverage. For  
169 both runs, demultiplexed sequences were paired and merged, and low quality bases,  
170 adapters, and primers were filtered prior to SNP calling. Default values were used  
171 for the *ipyrad* parameters in these steps, as well as for the clustering threshold  
172 (`clust_threshold`; 0.85) and minimum sequencing depth (`mindepth_statistical`; 6)  
173 parameters.

174       For our initial run, we specified a minimum number of samples per locus  
175 (`min_samples_locus`) parameter of 10, in order to obtain loci shared between two to three  
176 sample locations for any variety. Using the results from this run, we used the Python  
177 script `vcf2Jaccard.py` to compare samples with replicates by calculating the mean Jaccard  
178 similarity coefficients between all samples. We found that all replicates matched highly  
179 with their corresponding samples (Fig. S1).

180       After merging replicates and removing low coverage (generally, less than 30  
181 loci in the final assembly) samples from the dataset, 82 of our 87 original samples  
182 remained for our complex-wide analysis. We reran *ipyrad* (steps 1-7) using these 82  
183 samples to select for loci specific to this subset. We used a `min_samples_locus`  
184 parameter of 32 for this second run, to match the ratio of minimum samples per



185 locus used in our initial run; *ipyrad* default values were used otherwise. Because  
186 very low numbers of loci were retrieved for both herbarium specimens of *P.*  
187 *capillaris* (possibly due to the age of these specimens), we were unable to include  
188 *capillaris* in downstream clustering analyses.

189 VARIETY SPECIFIC CLUSTERING—In addition to our complex-wide survey, we  
190 were interested in exploring population structure within variety *maguirei* which  
191 could not be resolved using genetic loci shared across all species complex members.  
192 To do so, we ran *ipyrad* on just the 18 *maguirei* samples used in our complex-wide  
193 survey. Because five samples from each of the upper Logan canyon sampling sites  
194 were included in our *ipyrad* assembly, we specified a `min_samples_locus` parameter  
195 of 5; *ipyrad* default parameter values were used otherwise.

### 196 ***Population Analyses***

197 STRUCTURE—To visualize relations between complex members across their  
198 geographic range, and to determine the number of identifiable genetic clusters  
199 within the complex, we used the program STRUCTURE version 2.3 (Pritchard et al.  
200 2000). STRUCTURE uses Bayesian clustering analysis to probabilistically assign  
201 individuals to one or more of K source populations, where the loci within each  
202 population are assumed to be in Hardy-Weinberg proportions and linkage  
203 equilibrium. For all STRUCTURE runs, we used a burnin length of 50,000, and  
204 100,000 MCMC reps after burnin. For our complex-wide survey, we ran STRUCTURE  
205 for K values of 2—16, with 50 replicates per K value. For our *maguirei*-only  
206 analyses, we ran STRUCTURE for K values of 2—6, with 50 replicates per K value.  
207 We used the CLUMPAK server (Kopelman et al. 2015) to summarize results across

208 replicates for each K value, and to build STRUCTURE plots.

209           For all of our STRUCTURE analyses, we ran the Evanno et al. (2005) method  
210 (which identifies the greatest  $\Delta K$  value) and the method described in the STRUCTURE  
211 manual (Pritchard et al. 2000, which identifies the K value with the greatest likelihood) to  
212 determine an “optimal” K value. Given the difficulties in inferring an unambiguous  
213 number of genetic clusters from any given set of populations (Novembre 2016; Pritchard  
214 et al. 2000), we also examined STRUCTURE outputs within a range of K values, to  
215 determine which value of source populations best illustrated divisions within the species  
216 complex.

217           DISCRIMINANT ANALYSIS OF PRINCIPAL COMPONENTS—In addition to STRUCTURE,  
218 we analyzed the results of our complex-wide survey using Discriminant Analysis of  
219 Principal Components (DAPC; Jombart et al. 2010) in the package *adegenet* in R version  
220 3.6.3 (R Core Team, 2020). DAPC is a statistical technique designed to accommodate the  
221 size of genomic data sets and capable of differentiating within-group variation from  
222 between-group variation. SNP data is first transformed using a principal components  
223 analysis (PCA), and then k-means clustering is run to generate models and likelihoods  
224 corresponding to each number of population clusters. The best-fitting model, and so the  
225 best-supported number of populations, is assessed using the models’ Bayesian  
226 Information Criterion (BIC) scores. We chose to utilize DAPC in addition to  
227 STRUCTURE to visualize population clusters in a PCA format, and to determine  
228 whether the supported number of populations was congruent between methods, indicating  
229 a more robust determination of the number of species contained within the complex  
230 (Carstens et al. 2013).

231  $F_{ST}$  ESTIMATES—Because we wanted to measure the extent of genetic variance  
232 within the groups analyzed, we used the VCFtools software (Danecek et al. 2011) to  
233 generate weighted  $F_{ST}$  estimates (Weir and Cockerham 1984). We generated an  $F_{ST}$   
234 estimate for our complex-wide analysis (across all populations of all *P. cusickiana*  
235 varieties) as well as for the samples included in our variety *maguirei*-only analysis.

## 236 RESULTS

237 **Complex-Wide Genomic Survey**—We retrieved, on average,  $2.04 \times 10^6$  reads  
238 per sample, and our complex-wide *ipyrad* run identified 1,277 loci that were used in  
239 our subsequent STRUCTURE analysis. Using the Evanno et al. (2005) method  
240 yielded an optimal K value of  $K = 5$ ; using the method described in the STRUCTURE  
241 manual (Pritchard et al. 2000) identified the K value with the greatest likelihood as  
242  $K = 14$ . Based on our visualization of the STRUCTURE results for values ranging  
243 from  $K = 2$ —16 (Figs. S2 - S4), we determined  $K = 7$  to be the most biologically  
244 relevant K value (Fig. 2). At this level of source populations, varieties *domensis* and  
245 *maguirei* are clearly delineated, variety *nevadensis* shows distinctions between its  
246 two populations, and variety *cusickiana* is split into three groups composed of  
247 populations from the Snake River Plain in Idaho (SRP), Nevada (Jarbidge), and  
248 Oregon (Owyhee). Since higher K values emphasize the divisions seen at this level,  
249 and further subdivide isolated populations of varieties *cusickiana* and *nevadensis*,  $K$   
250  $= 7$  is a conservative estimate which reflects the strong divisions within this  
251 complex while allowing for further distinctions between unique populations to be  
252 made in light of more evidence in the future.

253 Our DAPC analysis revealed that the greatest supported number of clusters

254 (i.e. the value with the lowest BIC score) was eleven (data not shown)—a value  
255 incongruent with our STRUCTURE results, suggesting that boundaries within this  
256 complex are elaborate. However, at this level of genetic clusters, several groups  
257 were quite small (consisting of only one or two samples), and groupings were  
258 incoherent within the spatial distribution of populations. To provide a clearer  
259 comparison to our STRUCTURE results, and to examine relations strictly within the  
260 species complex, we removed *P. parryi* outgroup samples from our dataset (because  
261 these were separate from all species complex samples in preliminary analyses) and  
262 ran our DAPC with a specification of six clusters (Fig. 3). At this level of clustering,  
263 the population of *nevadensis* in the Snake Range of Great Basin National Park  
264 (GRBA) is shown as a unique cluster, while the *nevadensis* population further south  
265 in the Grant Range groups with the *cusickiana* population sampled from Oregon  
266 (Owyhee). Variety *domensis* is a unique cluster which groups closely to both of  
267 these. Thus, while neither our STRUCTURE analysis nor our DAPC point to an  
268 unambiguous number of "true" genetic clusters, both suggest that the current  
269 varietal classification is inexact. The extreme level of divergence between the sky  
270 island populations in this species complex is reflected not only in our clustering  
271 analyses, but also in our relatively large  $F_{ST}$  estimate across all complex populations,  
272 which was 0.72. Figure 4 illustrates proportions of sample membership to clusters  
273 based on our STRUCTURE analysis at  $K=7$  for all populations in their geographic  
274 context across the Great Basin.

275 **Variety Specific Clustering**—In our complex-wide analysis, all *maguirei* samples  
276 grouped as a single cluster, distinct from all other populations of all other varieties,

277 indicating that neither Logan Canyon population is more closely related to any  
278 populations of another variety. Even at values of  $K = 16$ , the upper and lower Logan  
279 Canyon populations of *maguirei* were not resolved from one another.  
280 However, reducing our sample set to only *maguirei* samples allowed us to retain loci  
281 informative to this variety but unshared with other complex member populations.  
282 Our *maguirei*-only *ipyrad* run generated an assembly with 68,492 loci, indicating a  
283 large number of loci specific to *maguirei* and not shared with the wider species  
284 complex. To speed up processing times, we ran STRUCTURE on a 17,988 loci subset  
285 of *maguirei*-specific markers. Using the CLUMPAK server, we found optimal  $K$  values  
286 of  $K = 4$  (using the Evanno method) and  $K = 3$  (using the likelihood method  
287 described in the STRUCTURE manual). Figure 5 shows the STRUCTURE plot at  $K = 3$ ,  
288 which resolves similar groupings of *maguirei* populations supported in Bjerregaard  
289 and Wolf (2004), and the distinctions between upper and lower canyon populations.  
290 We also estimated an  $F_{ST}$  value of 0.33 among these three populations, which is  
291 comparable to previous estimates in Bjerregaard and Wolf (2004).

## 292 DISCUSSION

293 Analysis of RADseq data from *Primula cusickiana* complex members  
294 demonstrates that the disjunct geographical distribution of populations across the Great  
295 Basin is reflected by pronounced genomic divergences. While the results of our  
296 clustering analyses coincide with the current varietal classifications, there are notable  
297 exceptions. Distinctions between isolated populations within varieties, as well as  
298 similarities between neighboring populations of different varieties, can be observed in our  
299 STRUCTURE plots for low  $K$  values (i.e. ranging from 2—6; see FIGS. S2-S4). For

300 instance, we found Mt. Washington *nevadensis* populations to be admixed, with segments  
301 coming from *domensis* to the east and (to a lesser extent) Grant Range *nevadensis*  
302 populations to the south. This is in accordance with analysis of AFLP and chloroplast  
303 DNA from the *Primula* section Parryi, which found these two varieties to be extremely  
304 close (Kelso et al. 2009).

305         Our results also suggest a more nuanced understanding of variety *cusickiana*.  
306 Populations of this variety are split into distinct genomic clusters in our analysis, with  
307 Jarbidge (Nevada) and Owyhee (Oregon) populations appearing unique from each other  
308 and the remaining Snake River Plain (SRP) populations in Idaho. That these distinctions  
309 are seen in both our STRUCTURE and DAPC analyses imply the robustness of this  
310 result. Given the relatively wide distribution of this variety (growing in moist soils at  
311 lower elevations than other complex members), our findings of genomic divergence  
312 between its populations is noteworthy, and support past evidence of phenotypic  
313 differences in different portions of its range. For instance, past morphological research of  
314 Idaho *cusickiana* populations has suggested dividing this taxa into three unique species  
315 (Mansfield 1993), with Owyhee populations being classified as *P. wilcoxiana*.

316         The separation between populations within variety *cusickiana*, as well as our  
317 support of past findings of significant genetic distances between the proximate  
318 populations of variety *maguirei*, underscore our discovery of profound genomic  
319 divergences between all members of this species complex, despite their distribution over  
320 a relatively small geographic area. This trend is reflected not only in our clustering  
321 analyses, but also in our weighted  $F_{ST}$  estimate of 0.72 across complex populations—a  
322 high value compared to similar estimates for other plant taxa (for instance, the mean  $F_{ST}$

323 for plant taxa in a meta-analysis by Leinonen et al. 2008 was calculated to be 0.24). Our  
324 results therefore support the historical designation of species for these complex members,  
325 rather than variety. Below, we consider how two phenomena—biogeographical trends in  
326 the Great Basin, and reproductive traits specific to *Primula*—may contribute to the  
327 significant divergence of these populations into distinct genomic groups.

328 ***Great Basin Sky Island Biogeography***—Members of the *P. cusickiana*  
329 complex are found at relatively high elevations throughout the Great Basin. Many of  
330 these are sky island locations associated with strong ecological shifts as habitat  
331 transitions from lower sagebrush steppe to cooler, more forested regions  
332 dominated by pinyon and juniper. Now separated by arid basins due to climatic  
333 warming in the Holocene, these sky islands are understood to be the fragmented  
334 remnants of a continuous region of cool, moist habitat which once extended across  
335 the Great Basin (Thompson and Mead 1982). This has led to their characterization  
336 as refugia for various taxa—particularly mammals (Brown 1971; Badgley et al.  
337 2014), but also butterflies (Boggs and Murphy 1997) and plants (Harper et al. 1978;  
338 Nowak et al. 1994; Charlet 2007). Additionally, in conjunction with climatic niche  
339 preferences, complex varieties *maguirei*, *domensis*, and *nevadensis* are found on the  
340 cliffs and crevices of exclusively limestone substrates. While it's unclear whether  
341 these habitats are tied to mineral or pH constraints, or simply reflect preferences for  
342 moisture-retentive substrates, edaphic heterogeneity is known to contribute to  
343 plant speciation and biodiversity, both globally (Hulshof and Spasojevic 2020) and  
344 within the Great Basin (e.g. de Queiroz et al. 2012). Therefore, allopatry across  
345 relatively similar climatic and edaphic niches seems to contribute to the genomic

346 divergences in *P. cusickiana*'s populations—a trend observed in other sections of  
347 Primulaceae, as well (Boucher et al. 2016).

348         However, it has also been noted that many species distribution patterns  
349 among Great Basin mountaintops do not follow a strictly island biogeographical  
350 model (Lawlor 1998), in that neither island surface area nor proximity to  
351 “mainland” source populations (typically identified as the western Sierra Nevadas  
352 or eastern Rocky Mountains) is predictive of species abundance (Fleishman et al.  
353 2001). And in some taxa, there is evidence for regular, modern dispersal between  
354 Great Basin ranges (Floyd et al. 2005). An alternative scenario is that this complex  
355 has followed what has been described as an “expanding-contracting archipelago”  
356 (ECA) model, in response to Quaternary glacial cycles (DeChaine and Martin 2005a).  
357 The ECA model has been used to describe the divergence between Rocky Mountain  
358 sky island plant taxa (Dechaine and Martin 2005b; Hodel et al. 2021), and provides a  
359 framework for explaining the genetic structure observed between isolated montane  
360 populations on a broad spatial scale. In this model, populations are assumed to  
361 become fragmented as they contract up-slope during warmer interglacials; during  
362 glacial periods, populations expand down-slope as moist, cool habitat becomes  
363 widespread, leading to hybrid zones and possible admixture. Given the degree of  
364 fragmentation between *P. cusickiana*'s populations in today's climate (which  
365 resembles past interglacial periods), and the admixture between the relatively  
366 proximate populations of varieties *domensis* and *nevadensis* revealed in our analysis,  
367 this model offers a viable explanation for the trends observed in this species  
368 complex. In addition to these biogeographic patterns, the evolution of *P. cusickiana*'s



369 disjunct populations is simultaneously influenced on a finer spatial scale by aspects  
370 particular to this species' biology.

371 ***Speciation and Heterostyly in Primula***—Recent research has shown several  
372 different alpine *Primula* species complexes to contain previously undescribed  
373 cryptic species, in China (Huang et al. 2019; Ren et al. 2020) and in Europe (Schorr  
374 et al. 2013; Theodoridis et al. 2019). Our findings on the *P. cusickiana* species  
375 complex resonate with these trends, and raise the question of what unique traits  
376 *Primula* possesses which might cause such frequent diversification via allopatric  
377 speciation. The authors of a study examining the *P. merrilliana* species complex in  
378 China (He et al. 2021) argue that heterostyly—a widespread breeding system in  
379 angiosperms to promote outcrossing—may be a driving force leading to speciation.  
380 In heterostyly, "pin" and "thrum" floral morphologies prevent self-fertilization via  
381 insect pollination (Darwin 1897), and are associated with a sporophytic-  
382 incompatibility system which follows a Mendelian pattern of inheritance (Li et al.  
383 2016). In *P. merrilliana*, the efficacy and prevalence of heterostyly and self-  
384 incompatibility varies across populations, which has possibly led to the divergence  
385 between distylous and homostylous populations and, ultimately, speciation.

386 While the presence of heterostyly has been observed in *nevadensis*  
387 (Holmgren 1967) and in populations of *cusickiana* and *domensis* (pers. obs.), the  
388 extent of distyly in a population has only been well documented in *maguirei*, who's  
389 upper and lower canyon populations have a pin:thrum morphology ratio of about  
390 1:1 (Davidson et al. 2014). This implies that in scenarios of legitimate xenogamy, in  
391 which morphs of one type only mate with morphs of the opposite type, only half of

392 the total population is available as a potential mate for any distylous individual.  
393 While this reduction in effective population size would seem to increase the  
394 strength of genetic drift, and possibly the fixation of deleterious alleles, these  
395 negative effects are potentially counterbalanced by the genetic advantages of  
396 outcrossing. This net benefit of heterostyly is supported by findings in de Vos et al.  
397 (2014), in which phylogenetic techniques were used to demonstrate that the  
398 presence of heterostyly in *Primula* leads to greater diversification via decreased  
399 extinction, in the long-term, compared to non-heterostylous clades of Primulaceae.  
400 Simultaneously, the loss of heterostyly and subsequent self-compatibility may lead  
401 to rapid speciation in the short-term. Observation of distylous morph ratios in other  
402 *P. cusickiana* varieties and populations, and changes in these ratios between  
403 proximate populations, would help to determine if these dynamics are driving the  
404 divergences we see at the species complex level.

405 **Conclusion**—The results of our genomic survey of *Primula cusickiana* fit into  
406 a wider trend demonstrating abundant allopatric speciation despite little niche  
407 divergence in other alpine *Primula* species complexes. Our findings support the  
408 historical classification of each of these complex members as unique species, rather  
409 than the varietal classification taken in Holmgren and Kelso (2001). Furthermore,  
410 these results warrant a more detailed understanding of the isolated and genetically  
411 unique populations in this complex (such as *cusickiana* populations in Nevada and  
412 Oregon), and of the admixture observed in the populations of variety *nevadensis*.  
413 Similarly, updated morphological comparisons between varieties, as well as  
414 observations into the levels of heterostyly in disjunct populations, would offer a

415 clearer understanding of the mechanisms of speciation occurring within this  
416 complex. Finally, the endemic species with narrow niches included in this study,  
417 such as *P. cusickiana* var. *maguirei*, but also *nevadensis*, *domensis*, and the sister  
418 species *P. capillaris*, warrant concern of extinction, and more work needs to be done  
419 to better understand the breeding limitations faced by each of these taxa and what  
420 can be done to ensure their survival in an increasingly arid Great Basin.

421 ACKNOWLEDGMENTS

422 his research was supported by funds provided by the Margaret Williams  
423 Research Grant offered by the Native Nevada Plant Society, the Lawrence Piette  
424 Graduate Scholarship offered by the USU College of Science, the Dr. Ivan J. Palmblad  
425 Graduate Research Award offered by the USU Department of Biology, and the  
426 Graduate Research Award offered by the USU Ecology Center. WDP and the Pearse  
427 Lab are funded by NSF EF-1802605, NSF ABI-1759965, and UKRI-NERC  
428 NE/V009710/1.

429 The authors would like to thank Dr. Carol Rowe for her help with the genetic  
430 analyses, her Python script used to calculate Jaccard similarities from SNP data, and her  
431 Python script for creating the map. Thanks also to Dr. Barbara Ertter and especially Dr.  
432 Don Mansfield at the College of Idaho, for their assistance in collecting variety  
433 *cusickiana*. Trish Winn and Jennifer Lewihnsohn in the United States Forest Service  
434 provided the collection permit for variety *maguirei* from the Uinta-Wasatch-Cache  
435 National Forest; Todd Stefanic and Gretchen Baker with the National Park Service  
436 coordinated collection from Craters of the Moon National Monument and Great Basin  
437 National Park, respectively. Michael Piep, Elizabeth Makings, and Jerry Tiehm allowed

438 for *Primula* specimens to be sampled from the Intermountain Herbarium, Arizona State  
439 Vascular Plant Herbarium, and University of Nevada, Reno Herbarium, respectively.  
440 Thanks also to Kris Valles at the Intermountain Herbarium. Dr. Leila Shultz assisted with  
441 identification of the Owyhee *cusickiana* population. The authors would also like to thank  
442 Jean Howerton, Buddy Smith, and Noel and Pat Holmgren. Finally, all collections were  
443 made on the ancestral lands of the Western Shoshone, Eastern Shoshone, Shoshone-  
444 Bannock, Southern Paiute, Goshute, and Nez Perce Native American tribes.

445 AUTHOR CONTRIBUTIONS

446 AK determined sample locations, performed the majority of sample collection, and ran  
447 genetic analyses. WDP contributed to study design and assisted with genetic analyses and  
448 manuscript writing. PW guided study design and assisted with genetic analyses, sample  
449 collection, and manuscript writing.

450

451 LITERATURE CITED

- 452 Badgley, C., Smiley, T. M., & Finarelli, J. A. (2014). Great Basin mammal diversity in  
453 relation to landscape history. *Journal of Mammalogy*, 95(6), 1090–1106.
- 454 Bjerregaard, L., & Wolf, P. G. (2008). Strong genetic differentiation among neighboring  
455 populations of a locally endemic primrose. *Western North American Naturalist*,  
456 68(1), 66–75.
- 457 Boggs, C. L., & Murphy, D. D. (1997). Community composition in mountain  
458 ecosystems: climatic determinants of montane butterfly distributions. *Global*  
459 *Ecology and Biogeography Letters*, 6(1), 39–48.

- 460 Boucher, F. C., Zimmermann, N. E., & Conti, E. (2016). Allopatric speciation with little  
461 niche divergence is common among alpine Primulaceae. *Journal of*  
462 *Biogeography*, 43(3), 591–602.
- 463 Brown, J. H. (1971). Mammals on mountaintops: nonequilibrium insular biogeography.  
464 *The American Naturalist*, 105(945), 467–478.
- 465 Carstens, B. C., Pelletier, T. A., Reid, N. M., & Satler, J. D. (2013). How to fail at species  
466 delimitation. *Molecular Ecology*, 22(17), 4369–4383.
- 467 Charlet, D. A. (2007). Distribution patterns of Great Basin conifers: Implications of  
468 extinction and immigration. *Aliso: A Journal of Systematic and Floristic Botany*,  
469 24(1), 31–61.
- 470 Coates, D. J., Byrne, M., & Moritz, C. (2018). Genetic diversity and conservation units:  
471 Dealing with the species-population continuum in the age of genomics. *Frontiers*  
472 *in Ecology and Evolution*, 6, 165.
- 473 Danecek, P., Auton, A., Abecasis, G., Albers, C. A., Banks, E., DePristo, M. A.,  
474 Handsaker, R. E., Lunter, G., Marth, G. T., Sherry, S. T., McVean, G., Durbin, R.,  
475 & 1000 Genomes Project Analysis Group. (2011). The variant call format and  
476 VCFtools. *Bioinformatics*, 27(15), 2156–2158.
- 477 Darwin, C. (1877). *The Different Forms of Flowers on Plants of the Same Species*. John  
478 Murray, London.
- 479 Davidson, J. B., Durham, S. L., & Wolf, P. G. (2014). Breeding system of the threatened  
480 endemic *Primula cusickiana* var. *maguirei* (Primulaceae). *Plant Species Biology*,  
481 29(3).
- 482

- 483 de Queiroz, T. F., Baughman, C., Baughman, O., Gara, M., & Williams, N. (2012).  
484 Species distribution modeling for conservation of rare, edaphic endemic plants in  
485 White River Valley, Nevada. *Natural Areas Journal*, 32(2), 149–158.
- 486 de Vos, J. M., Hughes, C. E., Schneeweiss, G. M., Moore, B. R., & Conti, E. (2014).  
487 Heterostyly accelerates diversification via reduced extinction in primroses.  
488 *Proceedings of the Royal Society B*, 281(1784).
- 489 DeChaine, E. G., & Martin, A. P. (2005a). Historical biogeography of two alpine  
490 butterflies in the Rocky Mountains: broad-scale concordance and local-scale  
491 discordance. *Journal of Biogeography*, 32(11), 1943–1956.
- 492 Dechaine, E. G., & Martin, A. P. (2005b). Marked genetic divergence among sky island  
493 populations of *Sedum lanceolatum* (Crassulaceae) in the Rocky Mountains.  
494 *American Journal of Botany*, 92(3), 477–486.
- 495 Eaton, D. A. R., & Overcast, I. (2020). ipyrad: interactive assembly and analysis of  
496 RADseq datasets. *Bioinformatics*, 36(8), 2592–2594.
- 497 Elshire, R. J., Glaubitz, J. C., Sun, Q., Pol, J. A., Kawamoto, K., Buckler, E. S., &  
498 Sharon, E. (2011). A robust, simple genotyping-by-sequencing (GBS) approach  
499 for high diversity species. *PloS One*, 6(e19379).
- 500 Fish and Wildlife Service, Department of the Interior. (1985). *Endangered and*  
501 *Threatened Wildlife and Plants; Final Rule to Determine Primula Maguirei*  
502 *(Maguire Primrose) To Be a Threatened Species* (Vol. 50, pp. 49–52).
- 503 Fleishman, E., Austin, G. T., & Murphy, D. D. (2001). Biogeography of Great Basin  
504 butterflies: revisiting patterns, paradigms, and climate change scenarios.  
505 *Biological Journal of the Linnean Society*, 74(4), 501–515.

- 506 Floyd, C. H., Van Vuren, D. H., & May, B. (2005). Marmots on great basin  
507 mountaintops: using genetics to test a biogeographic paradigm. *Ecology*, *86*(8),  
508 2145–2153.
- 509 Gray, A. (1888). *Synoptical Flora of North America*. Ivison, Blakeman, Taylor & Co.
- 510 Harper, K. T., Freeman, C. D., Ostler, K. W., & Klikoff, L. G. (1978). The flora of Great  
511 Basin mountain ranges: diversity sources and dispersal ecology. *Great Basin*  
512 *Naturalist Memoirs*, *2*, 81–103.
- 513 He, X., Cao, J.-J., Zhang, W., Li, Y.-Q., Zhang, C., Li, X.-H., Xia, G.-H., & Shao, J.-W.  
514 (2021). Integrative taxonomy of herbaceous plants with narrow fragmented  
515 distributions: a case study on *Primula merrilliana* species complex. *Journal of*  
516 *Systematics and Evolution*
- 517 Hewitt, G. M. (1996). Some genetic consequences of ice ages, and their role in  
518 divergence and speciation. *Biological Journal of the Linnean Society*, *58*(3), 247–  
519 276.
- 520 Hodel, R. G. J., Massatti, R., Bishop, S. G. D., & Knowles, L. L. (2021). Testing which  
521 axes of species differentiation underlie covariance of phylogeographic similarity  
522 among montane sedge species. *Evolution*
- 523 Holmgren, N. H. (1967). A new species of primrose from Nevada. *Madroño*, *19*(1), 27–  
524 29.
- 525 Holmgren, N. H., & Holmgren, A. H. (1974). Three new species from the Great Basin.  
526 *Brittonia*, *26*(3), 309–315.
- 527 Holmgren, N. H., Holmgren, P. K., & Cronquist, A. (2005). *Intermountain flora:*  
528 *vascular plants of the Intermountain West, USA. Volume two, Part B: Subclass*

- 529            *Dilleniidae*. New York Botanical Garden.
- 530    Holmgren, N. H., & Kelso, S. (2001). *Primula cusickiana* (Primulaceae) and its varieties.
- 531            *Brittonia*, 53(1), 154–156.
- 532    Huang, J. (2020). Is population subdivision different from speciation? From
- 533            phylogeography to species delimitation. *Ecology and Evolution*, 36, 303.
- 534    Huang, Y.-F., Dong, L.-N., & Xu, W.-B. (2019). *Lysimachia fanii*, a new species of
- 535            Primulaceae from limestone area of Guangxi, China. *PhytoKeys*, 130, 75–84.
- 536    Hulshof, C. M., & Spasojevic, M. J. (2020). The edaphic control of plant diversity.
- 537            *Global Ecology and Biogeography*, 29(10), 1634–1650.
- 538    Jombart, T., Devillard, S., & Balloux, F. (2010). Discriminant analysis of principal
- 539            components: a new method for the analysis of genetically structured populations.
- 540            *BMC Genetics*, 11, 94.
- 541    Kass, R., & Welsh, S. (1985). New Species of *Primula* (Primulaceae) from Utah. *The*
- 542            *Great Basin Naturalist*, 45(3), 548–550.
- 543    Kelso, S., Beardsley, P. M., & Weitemier, K. (2009). Phylogeny and Biogeography of
- 544            *Primula* sect. *Parryi* (Primulaceae). *International Journal of Plant Sciences*,
- 545            170(1), 93–106.
- 546    Lawlor, T. E. (1998). Biogeography of Great Basin mammals: paradigm lost? *Journal of*
- 547            *Mammalogy*, 79(4), 1111–1130.
- 548    Leinonen, T., O’Hara, R. B., Cano, J. M., & Merilä, J. (2008). Comparative studies of
- 549            quantitative trait and neutral marker divergence: a meta-analysis. *Journal of*
- 550            *Evolutionary Biology*, 21(1), 1–17.
- 551    Li, J., Cocker, J. M., Wright, J., Webster, M. A., McMullan, M., Dyer, S., Swarbreck, D.,



552 Caccamo, M., van Oosterhout, C., & Gilmartin, P. M. (2016). Genetic  
553 architecture and evolution of the S locus supergene in *Primula vulgaris*. *Nature*  
554 *Plants*, 2(12), 16188.

555 Mansfield, D. (1993). The status of “*Primula wilcoxiana*” and the *Primula cusickiana*  
556 complex in Southwestern Idaho. Bureau of Land Management, U.S. Department  
557 of the Interior.

558 Novembre, J. (2016). Pritchard, Stephens, and Donnelly on Population Structure.  
559 *Genetics*, 204(2), 391–393.

560 Nowak, C. L., Nowak, R. S., Tausch, R. J., & Wigand, P. E. (1994). Tree and shrub  
561 dynamics in northwestern Great Basin woodland and shrub steppe during the  
562 Late-Pleistocene and Holocene. *American Journal of Botany*, 81(3), 265–277.

563 Pritchard, J. K., Stephens, M., & Donnelly, P. (2000). Inference of population structure  
564 using multilocus genotype data. *Genetics*.

565 R Core Team (2020). R: A language and environment for statistical computing.  
566 R Foundation for Statistical Computing, Vienna, Austria.

567 Ren, G., Mateo, R. G., Conti, E., & Salamin, N. (2020). Population genetic structure and  
568 demographic history of *Primula fasciculata* in Southwest China. *Frontiers in*  
569 *Plant Science*, 11, 986.

570 Schorr, G., Pearman, P. B., Guisan, A., & Kadereit, J. W. (2013). Combining  
571 palaeodistribution modelling and phylogeographical approaches for identifying  
572 glacial refugia in alpine *Primula*. *Journal of Biogeography*, 40(10), 1947–1960.

573 Theodoridis, S., Nogués-Bravo, D., & Conti, E. (2019). The role of cryptic diversity and  
574 its environmental correlates in global conservation status assessments: Insights

- 575 from the threatened bird's-eye primrose (*Primula farinosa* L.). *Diversity and*  
576 *Distributions*, 25, 1457–1471.
- 577 Thompson, R. S., & Mead, J. I. (1982). Late Quaternary environments and biogeography  
578 in the Great Basin. *Quaternary Research*, 17(1), 39–55.
- 579 Weir, B. S., & Cockerham, C. C. (1984). Estimating F-Statistics for the analysis of  
580 population structure. *Evolution*, 38(6), 1358–1370.
- 581 Williams, L. O. (1936). Revision of the Western Primulas. *The American Midland*  
582 *Naturalist*, 17(4), 741–748.
- 583 Wolf, P. G., & Sinclair, R. B. (1997). Highly differentiated populations of the narrow  
584 endemic plant Maguire Primrose (*Primula maguirei*). *Conservation Biology*,  
585 11(2), 375–381.
- 586 Yang, L., Kong, H., Huang, J.-P., & Kang, M. (2019). Different species or genetically  
587 divergent populations? Integrative species delimitation of the *Primulina*  
588 *hochiensis* complex from isolated karst habitats. *Molecular Phylogenetics and*  
589 *Evolution*, 132, 219–231.
- 590
- 591 APPENDIX 1. Voucher specimens. Order of data is as follows: Species, Voucher,  
592 Herbarium. Institutional barcodes or accession numbers are included as  
593 parenthetical values following the voucher, when available.
- 594 **Ingroup:** *Primula cusickiana* var. *cusickiana*, 25330978, Intermountain  
595 Herbarium; *Primula cusickiana* var. *cusickiana*, 25330990, Intermountain  
596 Herbarium; *Primula cusickiana* var. *cusickiana*, 25331045, Intermountain  
597 Herbarium; *Primula cusickiana* var. *cusickiana*, 25331062, Intermountain

598 Herbarium; *Primula cusickiana* var. *cusickiana*, 25331021, Intermountain  
599 Herbarium; *Primula cusickiana* var. *cusickiana*, 25331015, Intermountain  
600 Herbarium; *Primula cusickiana* var. *cusickiana*, 25331018, Intermountain  
601 Herbarium; *Primula cusickiana* var. *cusickiana*, 25331034, Intermountain  
602 Herbarium; *Primula cusickiana* var. *cusickiana*, 25331004, Intermountain  
603 Herbarium; *Primula cusickiana* var. *cusickiana*, 25330994, Intermountain  
604 Herbarium; *Primula cusickiana* var. *cusickiana*, 25330991, Intermountain  
605 Herbarium; *Primula cusickiana* var. *maguirei*, 25331026, Intermountain Herbarium;  
606 *Primula cusickiana* var. *maguirei*, 25331039, Intermountain Herbarium; *Primula*  
607 *cusickiana* var. *maguirei*, 25331041, Intermountain Herbarium; *Primula cusickiana*  
608 var. *nevadensis*, 25331101, Intermountain Herbarium; *Primula cusickiana* var.  
609 *nevadensis*, 25331106, Intermountain Herbarium; *Primula cusickiana* var.  
610 *nevadensis*, 25331092, Intermountain Herbarium; *Primula cusickiana* var. *domensis*,  
611 25331066, Intermountain Herbarium; *Primula cusickiana* var. *domensis*, 25331070,  
612 Intermountain Herbarium; *Primula cusickiana* var. *domensis*, 25331077,  
613 Intermountain Herbarium; *Primula cusickiana* var. *domensis*, 25331083,  
614 Intermountain Herbarium;  
615 **Outgroups:** *Primula capillaris*, 770850 (ASU0020421), Arizona State  
616 University Vascular Plant Herbarium; *Primula capillaris*, 3025822 (UTC00138833),  
617 Intermountain Herbarium; *Primula parryi*, 25331110, Intermountain Herbarium;  
618 *Primula parryi*, 25331112, Intermountain Herbarium  
619

620 FIG. 1. Four members of the *Primula cusickiana* species complex: (A) *maguirei*,

621 in Right Hand Fork of Logan Canyon; (B) *cusickiana*, near Cougar Point in Jarbidge,  
622 Nevada; (C) *domensis*, at Notch Peak in the House Range, Utah; (D) *nevadensis*, on  
623 Mount Washington in the Snake Range (Great Basin National Park), in Nevada.

624 FIG. 2. Sample STRUCTURE plots at  $K = 7$ . At this level of clustering, divisions  
625 between isolated populations of variety *cusickiana* in Idaho (Snake River Plain, or  
626 SRP), Nevada (Jarbidge), and Oregon (Owyhee) are clearly shown. Similarities  
627 between populations of variety *nevadensis* in Great Basin National Park (GRBA) and  
628 *domensis* are shown, while populations of *nevadensis* further south in the Grant  
629 Range (Troy) are more distinct.

630 FIG. 3. DAPC of only *P. cusickiana* complex samples with number of genetic  
631 clusters specified at 6; percentage of total variance for each PC axis shown. Similar  
632 to STRUCTURE results at  $K = 7$ , this analysis shows all *maguirei* populations as  
633 distinct from all other complex populations. Populations of varieties *domensis* and  
634 *nevadensis* group closely with *cusickiana* population from Oregon  
635 (“*cusickiana*\_Owyhee”).

636 FIG. 4. Map of sample locations with cluster membership. Sampling locations  
637 are represented by pie charts indicating percentage of population membership to  
638 clusters determined at  $K = 7$  STRUCTURE clustering threshold. With exception to  
639 *nevadensis*, most samples fall almost entirely within a specified cluster.

640 FIG. 5. STRUCTURE plot for *maguirei* samples at a clustering threshold of  $K =$   
641 3. While *maguirei* clustered together in the complex-wide analysis, our *maguirei*-  
642 only analysis was able to reveal the Logan Canyon population divisions illustrated in  
643 past studies.

- 644            FIG. S1. Distribution of pairwise Jaccard similarities across all samples.  
645            Similarity values of replicates are indicated by red vertical lines.
- 646            FIG. S2. STRUCTURE plots for all samples, K values ranging from 2 to 6.  
647            FIG. S3. STRUCTURE plots for all samples, K values ranging from 7 to 11.  
648            FIG. S4. STRUCTURE plots for all samples, K values ranging from 12 to 16.

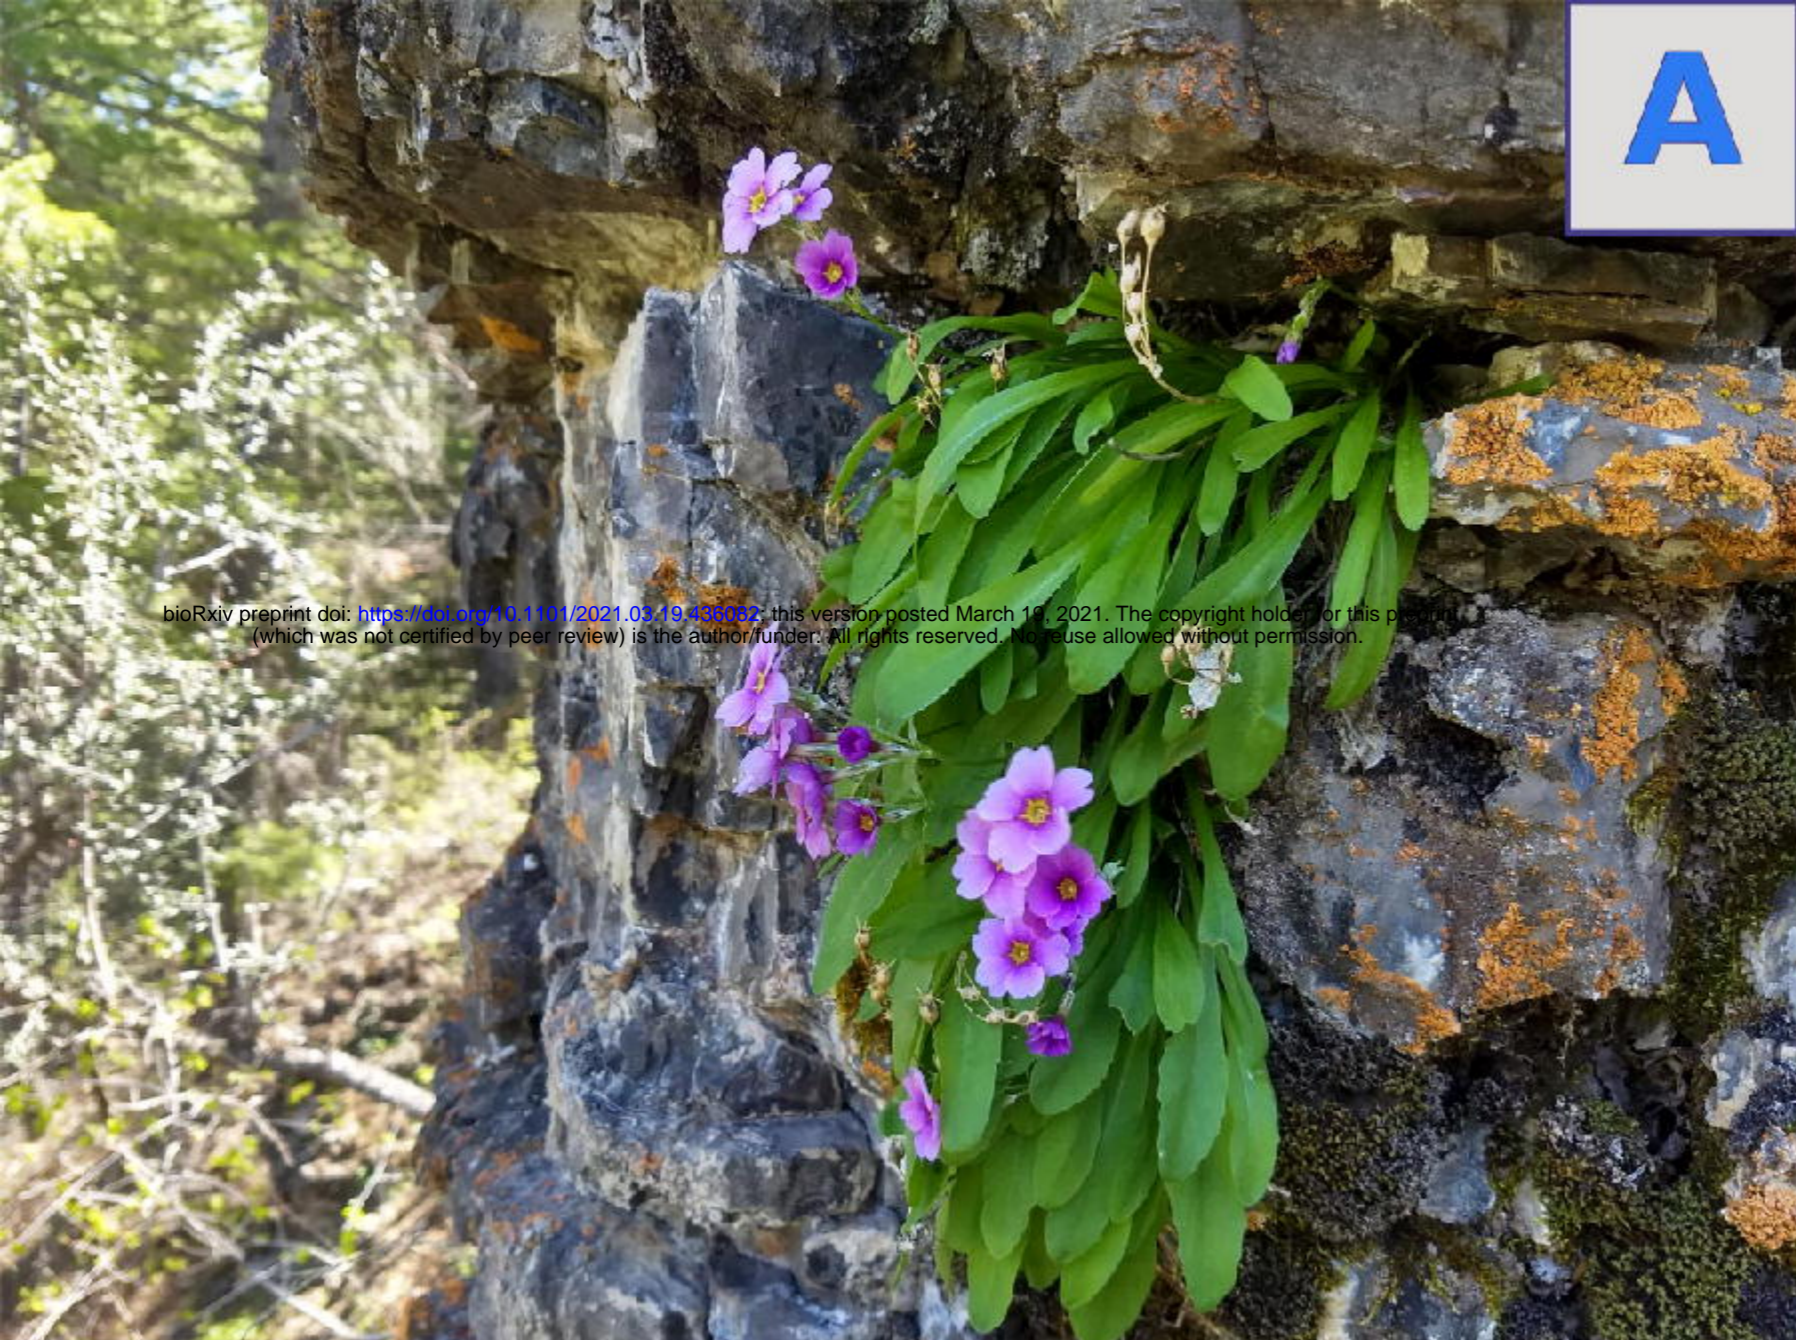

bioRxiv preprint doi: <https://doi.org/10.1101/2021.03.19.436702>; this version posted March 19, 2021. The copyright holder for this preprint (which was not certified by peer review) is the author/funder. All rights reserved. No reuse allowed without permission.

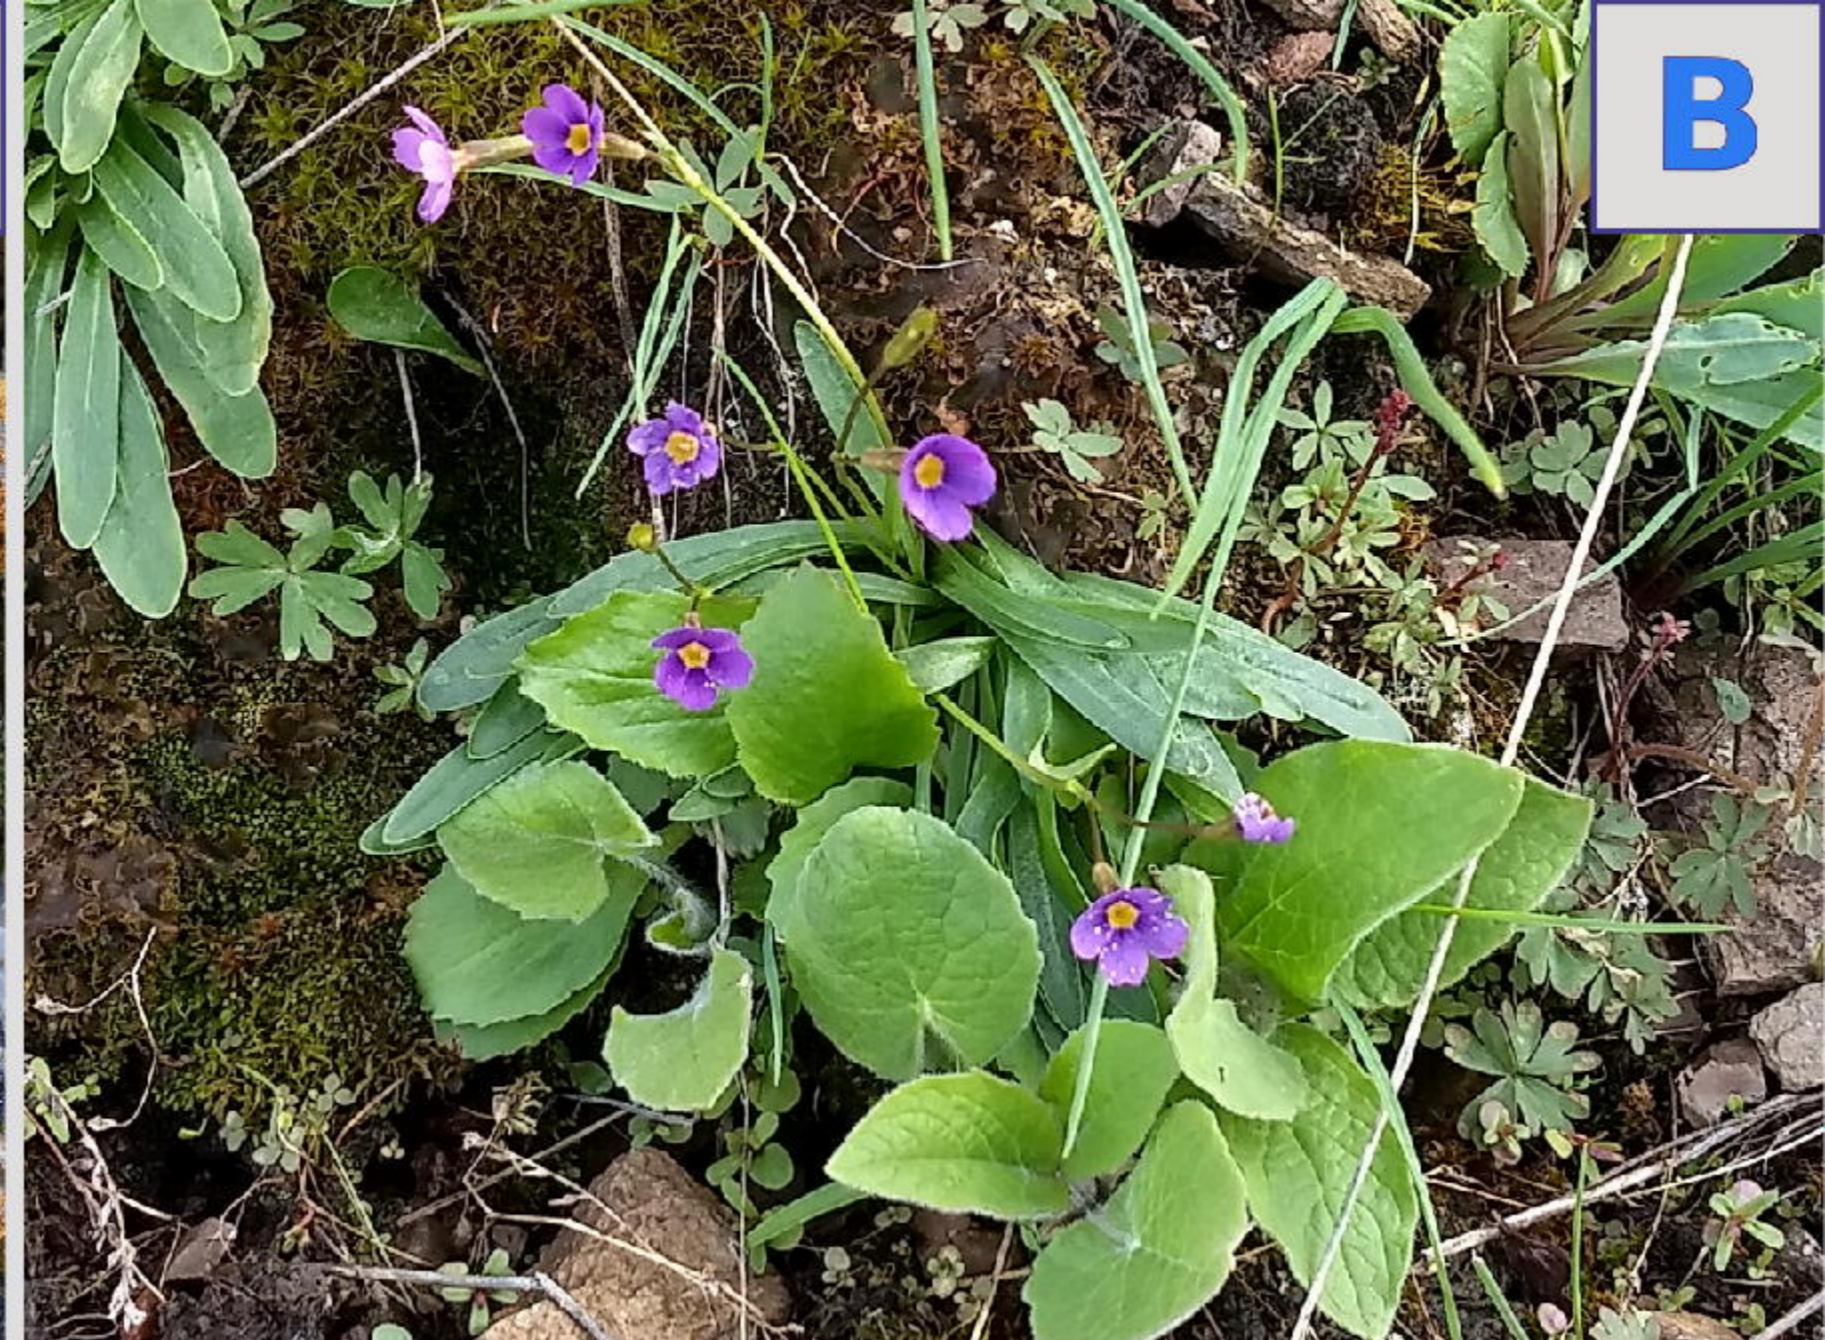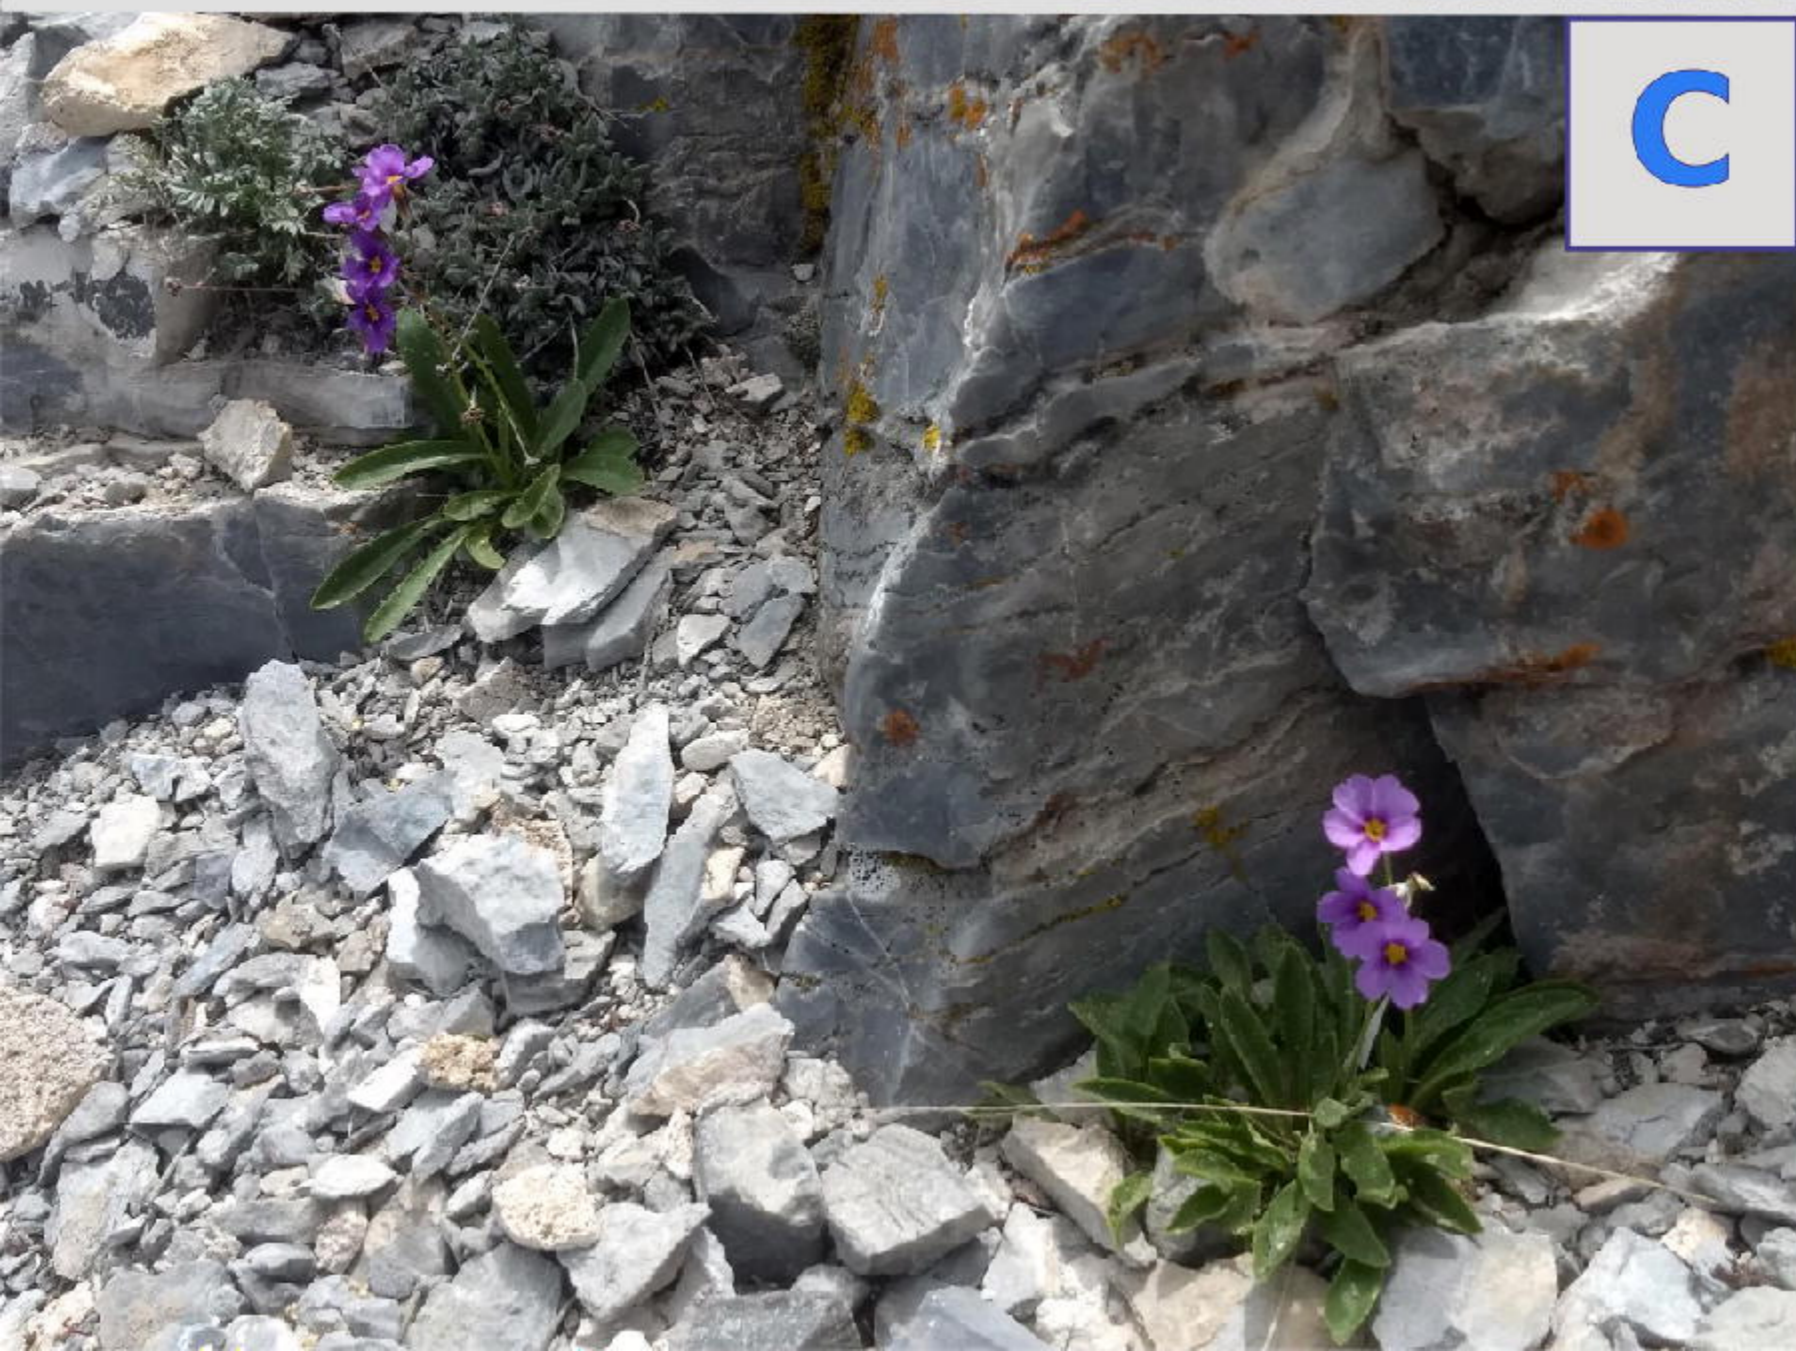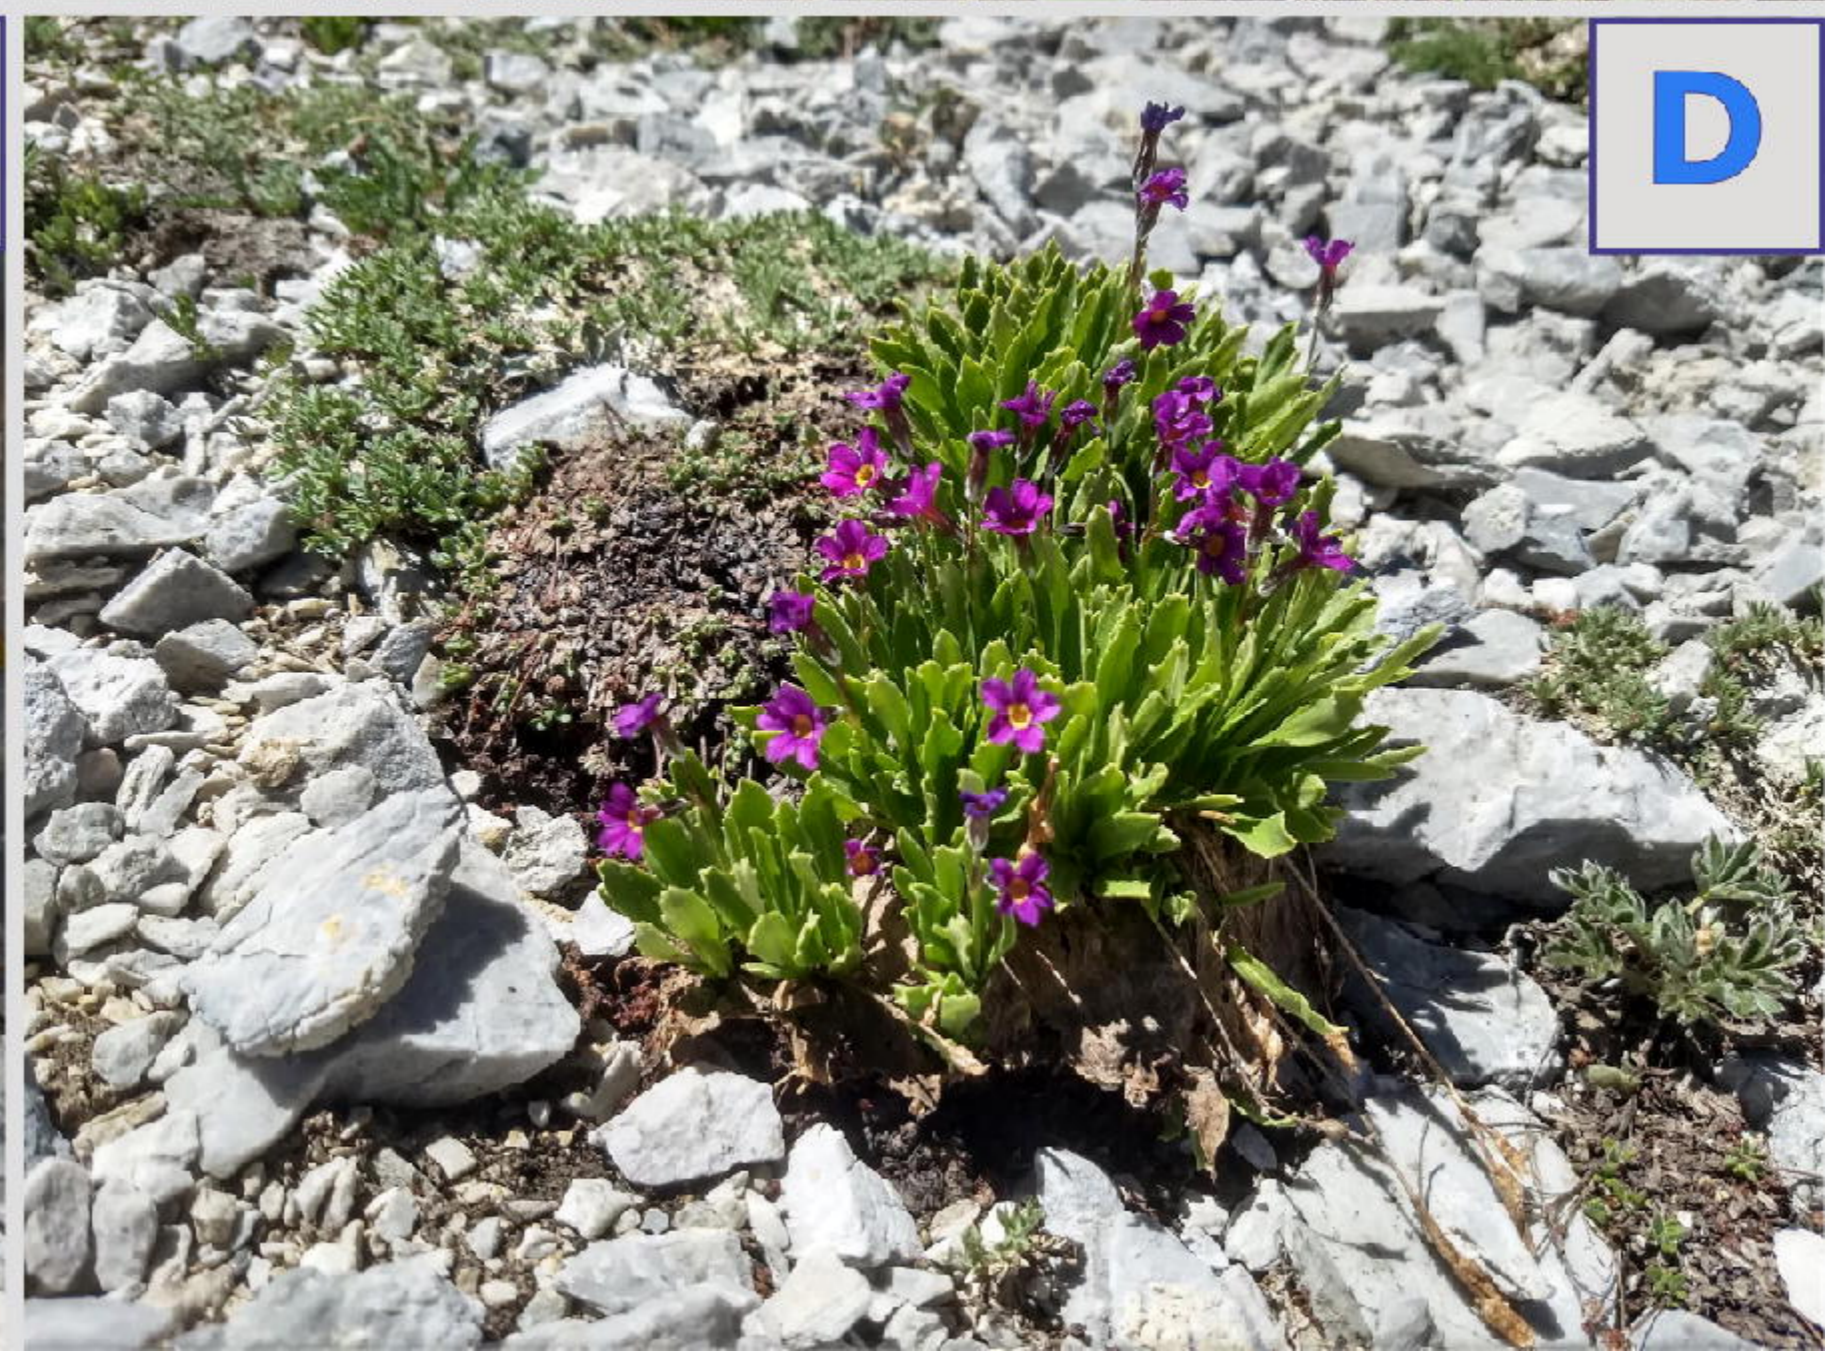

K=7

bioRxiv preprint doi: <https://doi.org/10.1101/2021.03.19.438082>; this version posted March 19, 2021. The copyright holder for this preprint (which was not certified by peer review) is the author/funder. All rights reserved. No reuse allowed without permission.

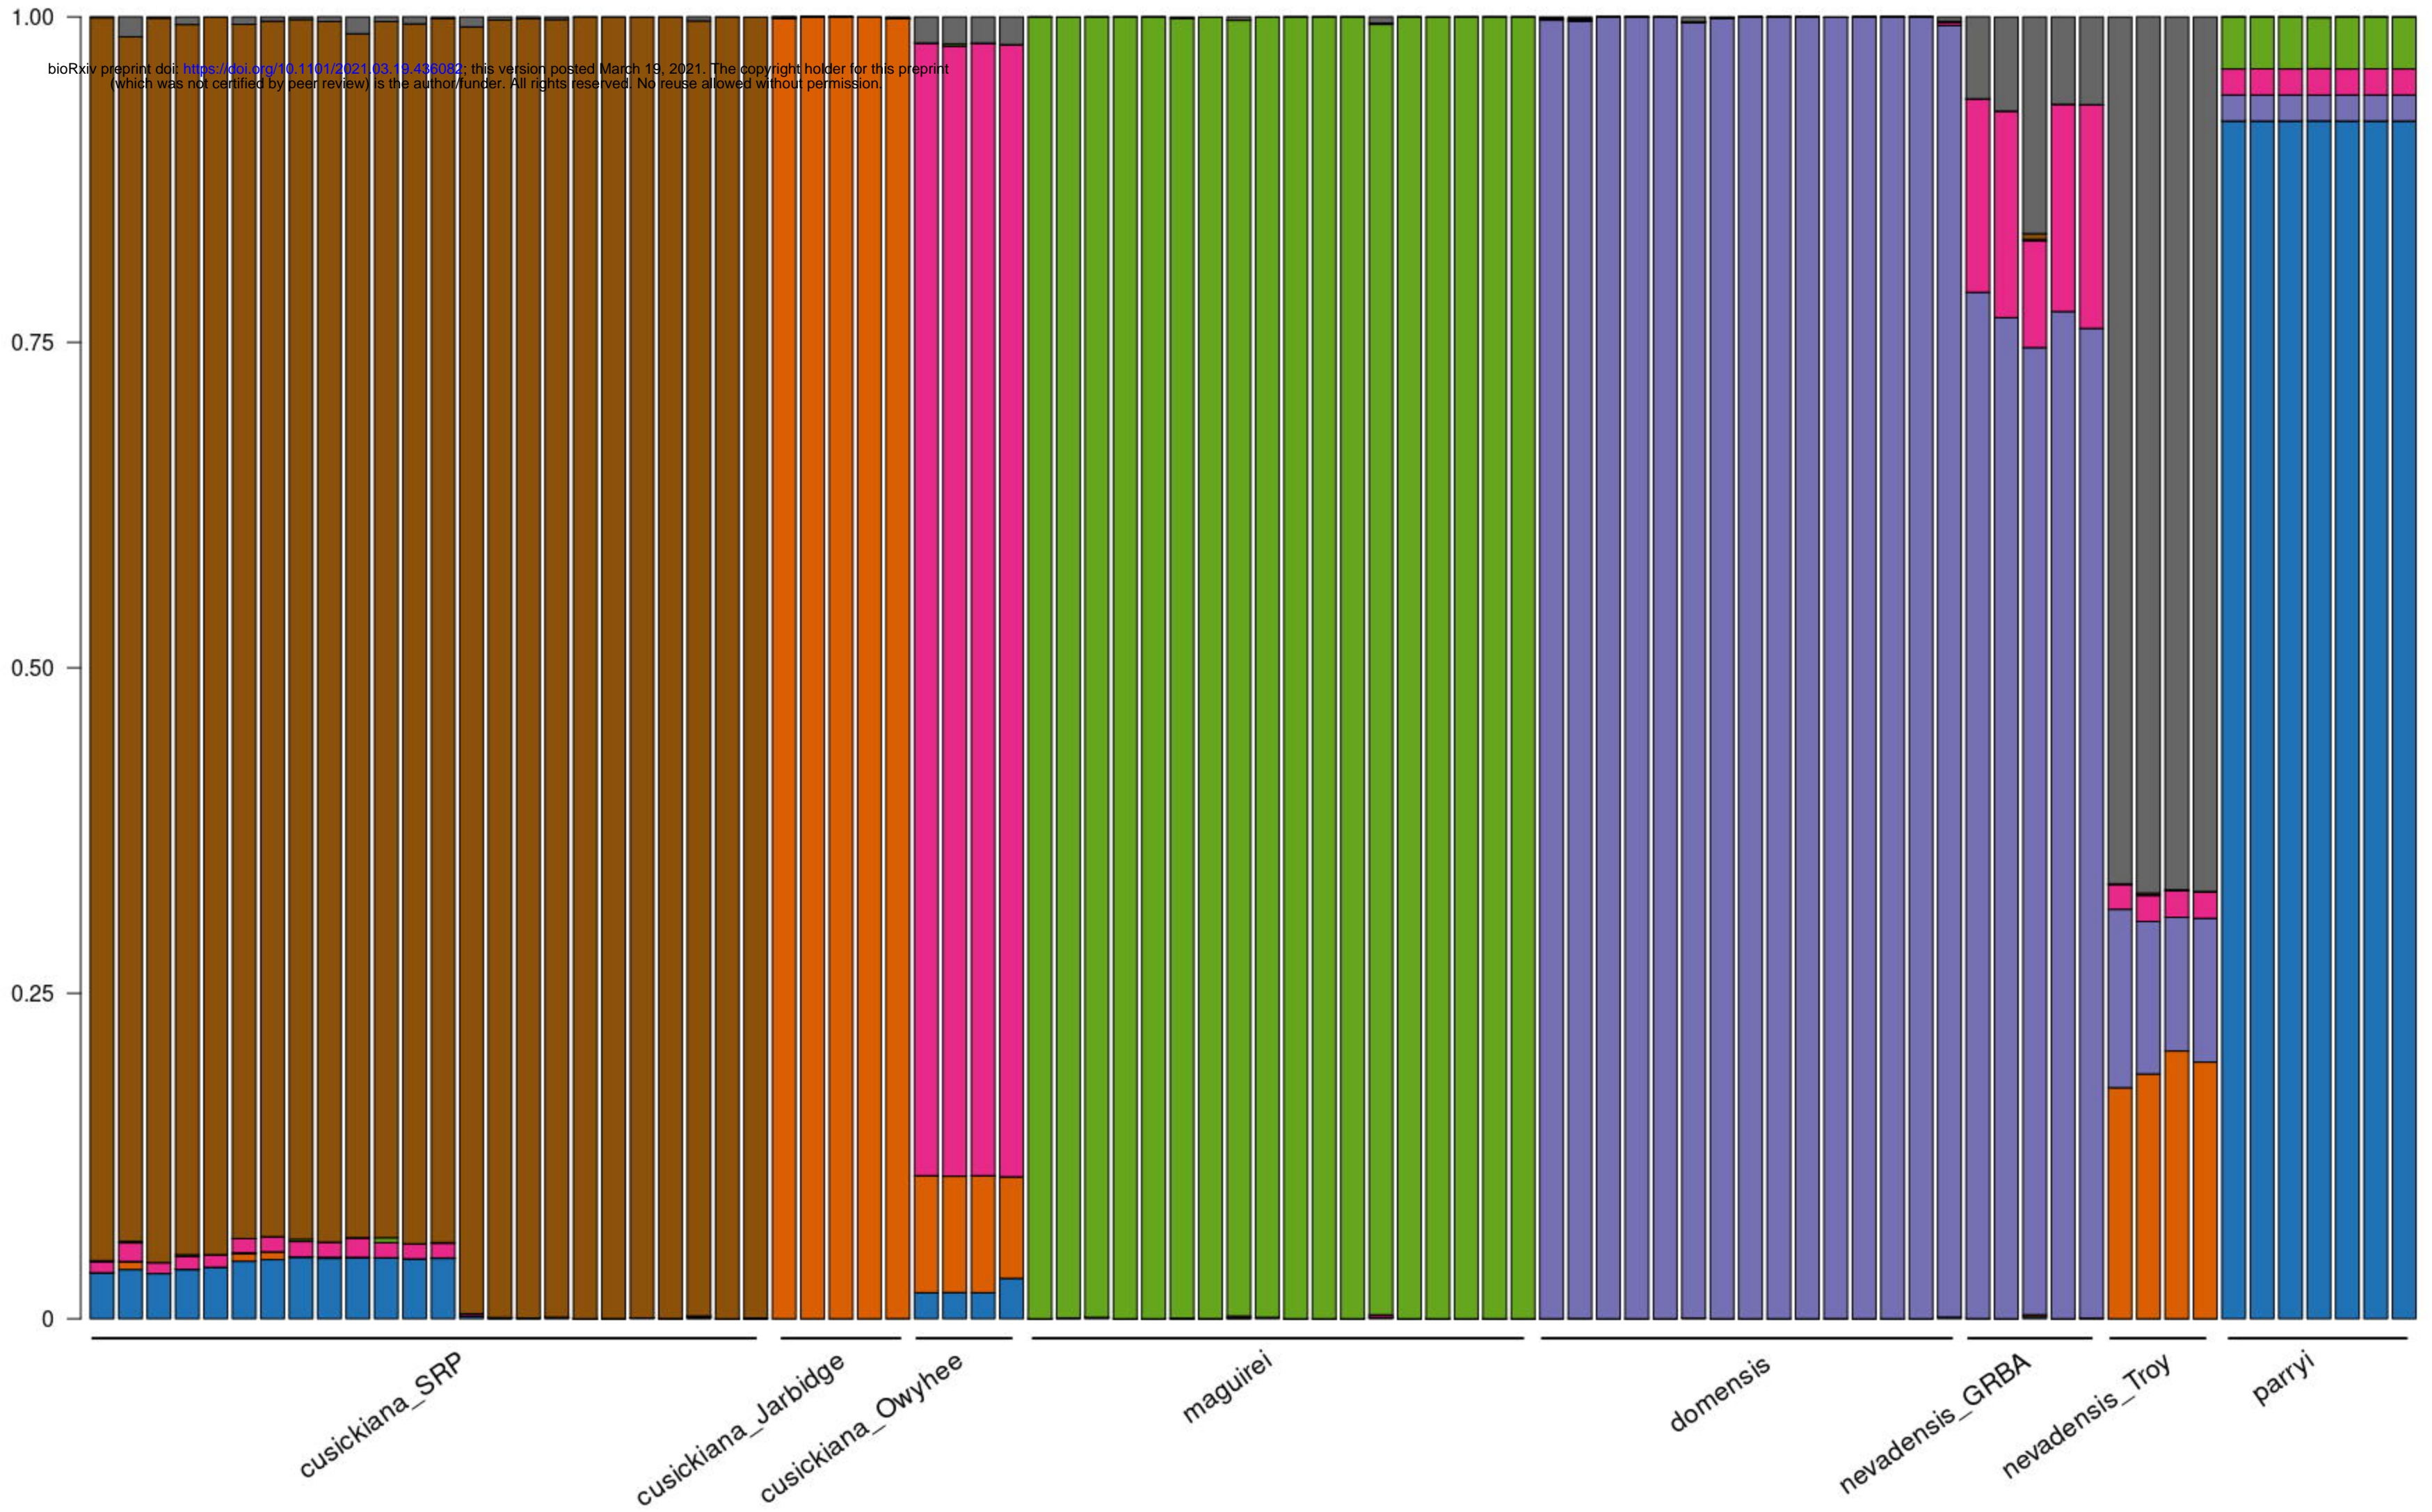

PC 2: 23.29%

PC 1: 50.98%

● maguirei  
● cusickiana\_SRP  
● domensis

● cusickiana\_Owyhee  
● nevadensis\_GRBA  
● cusickiana\_Jarbidge

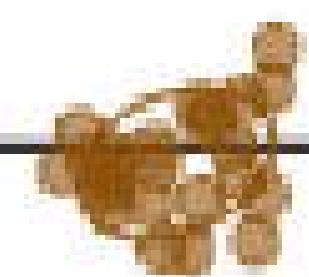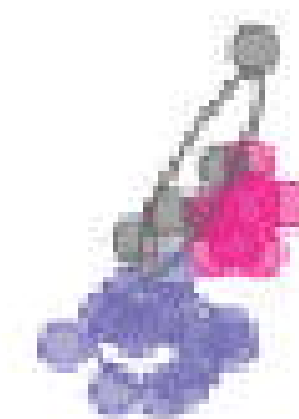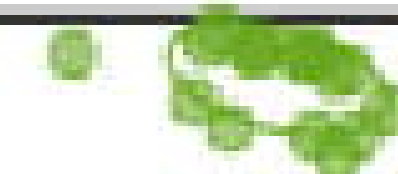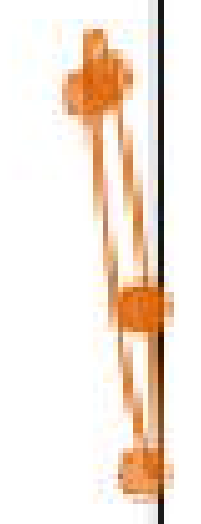



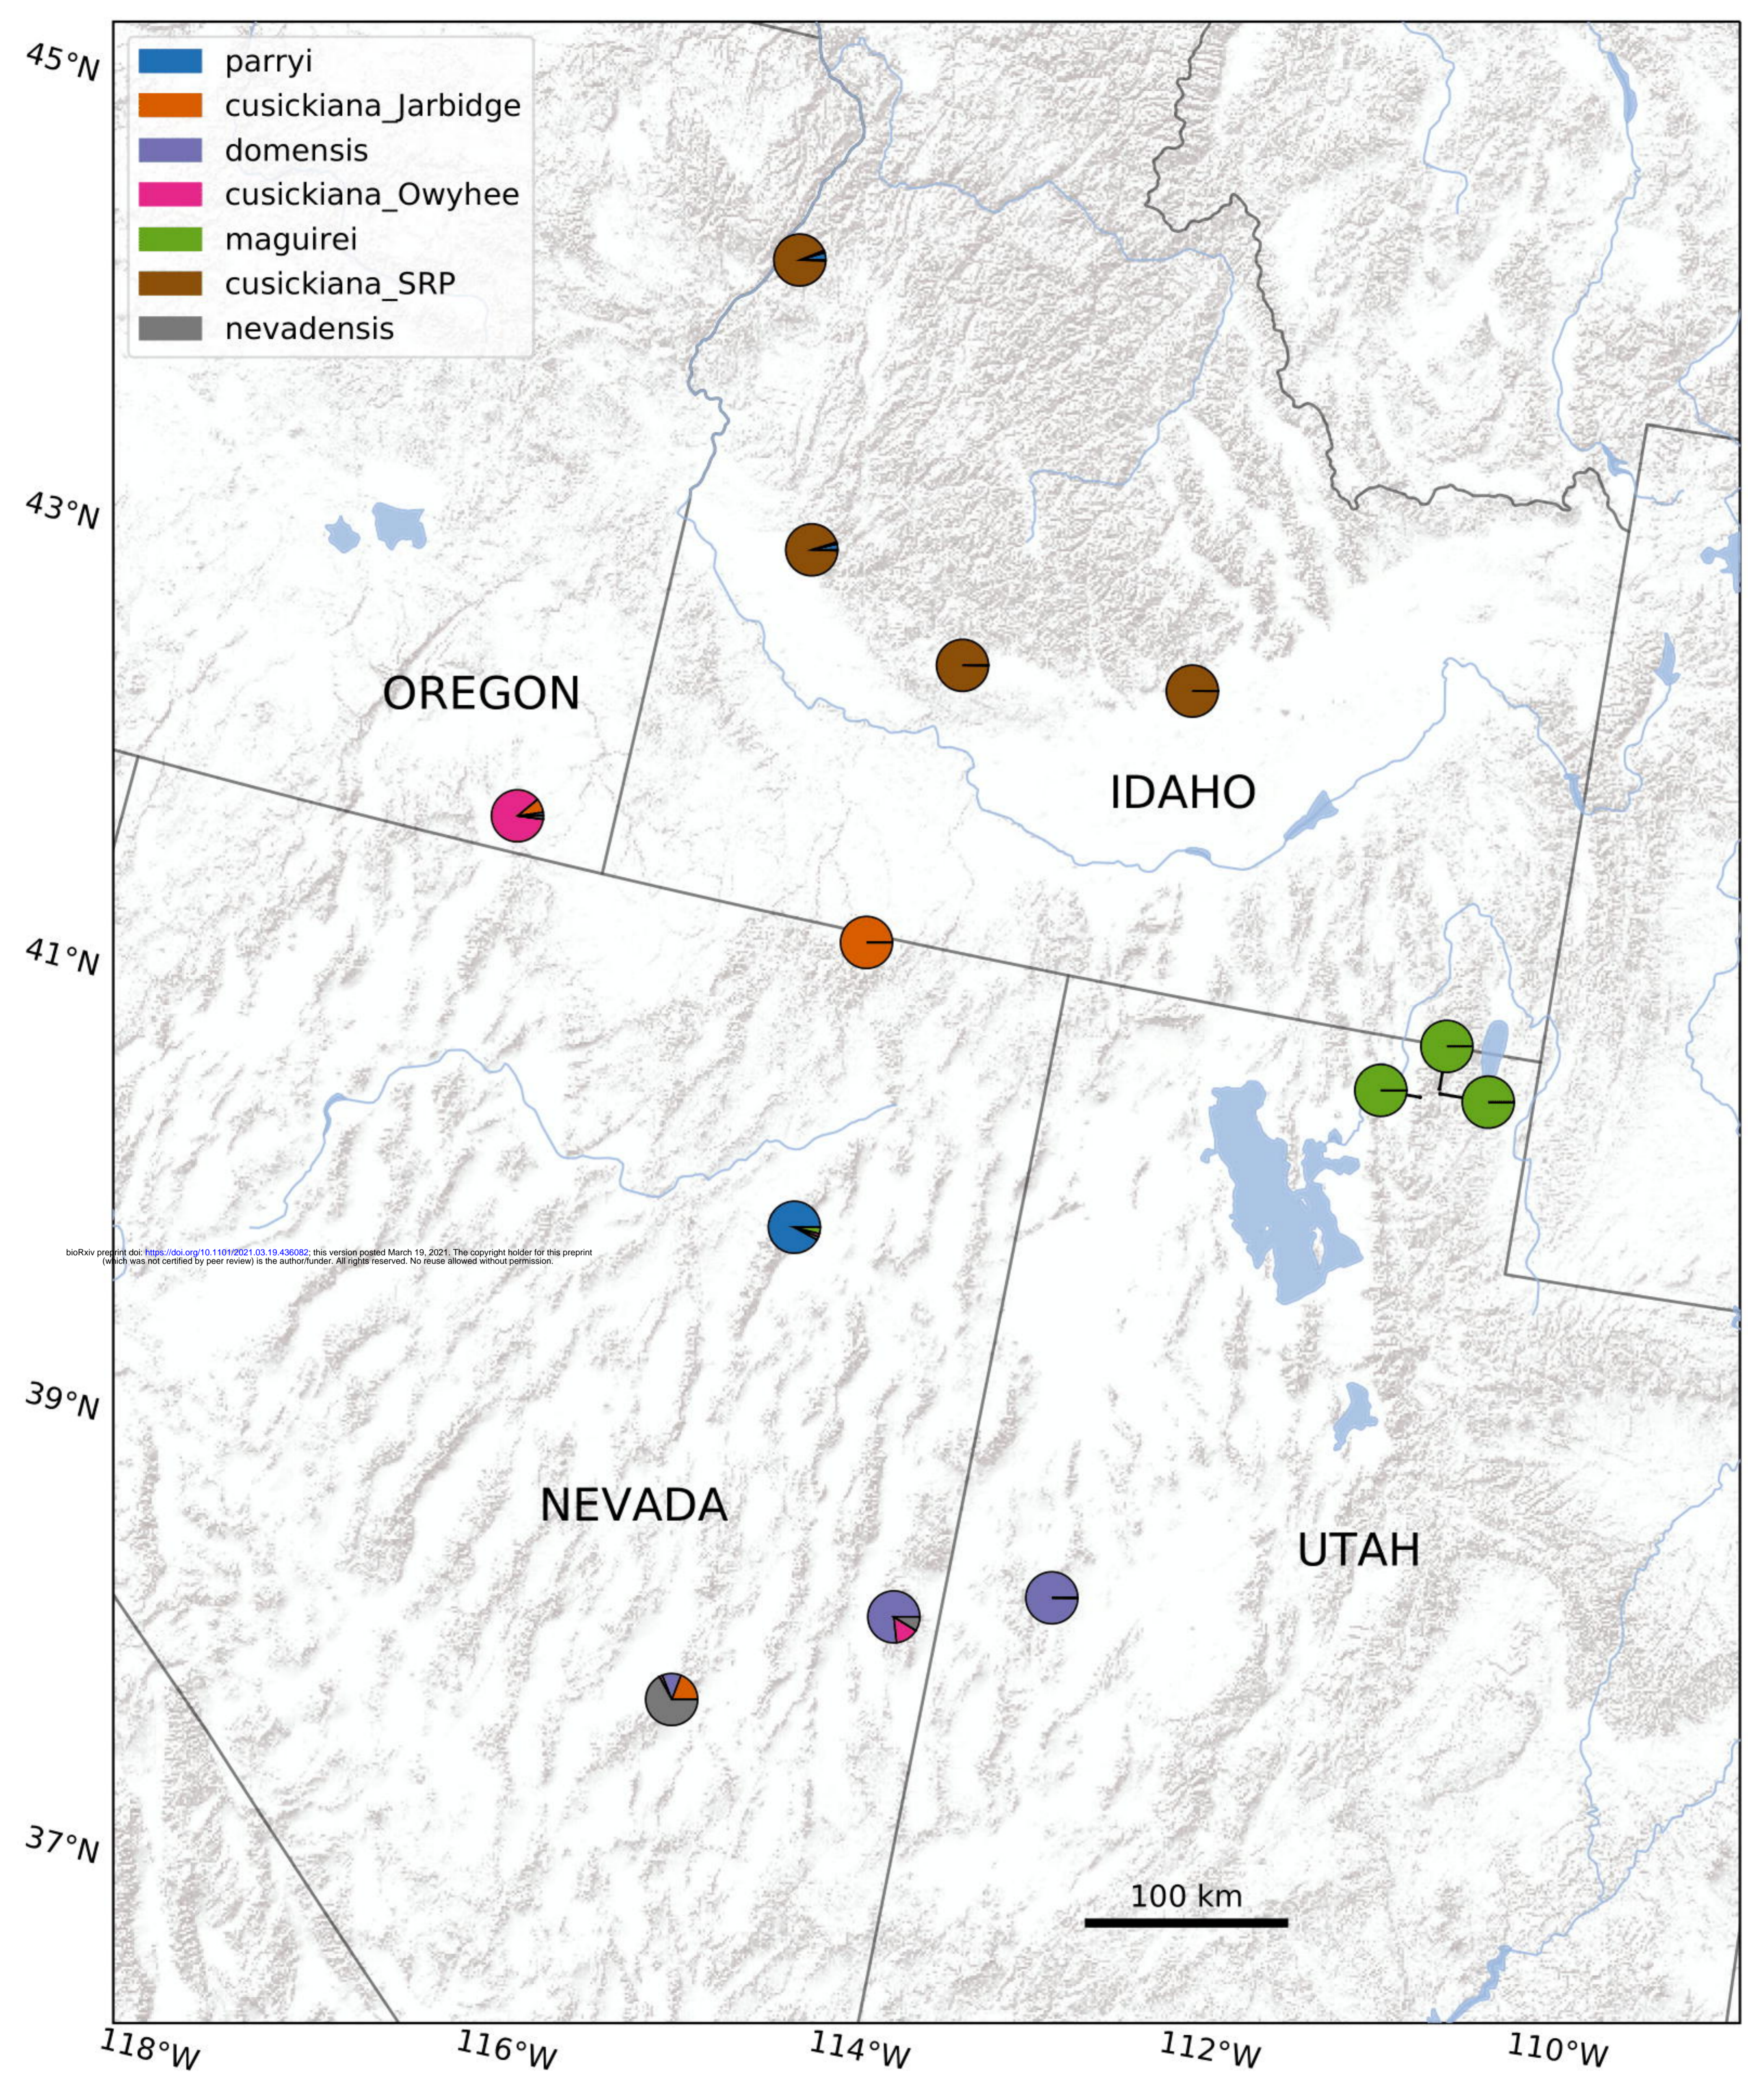

K=3

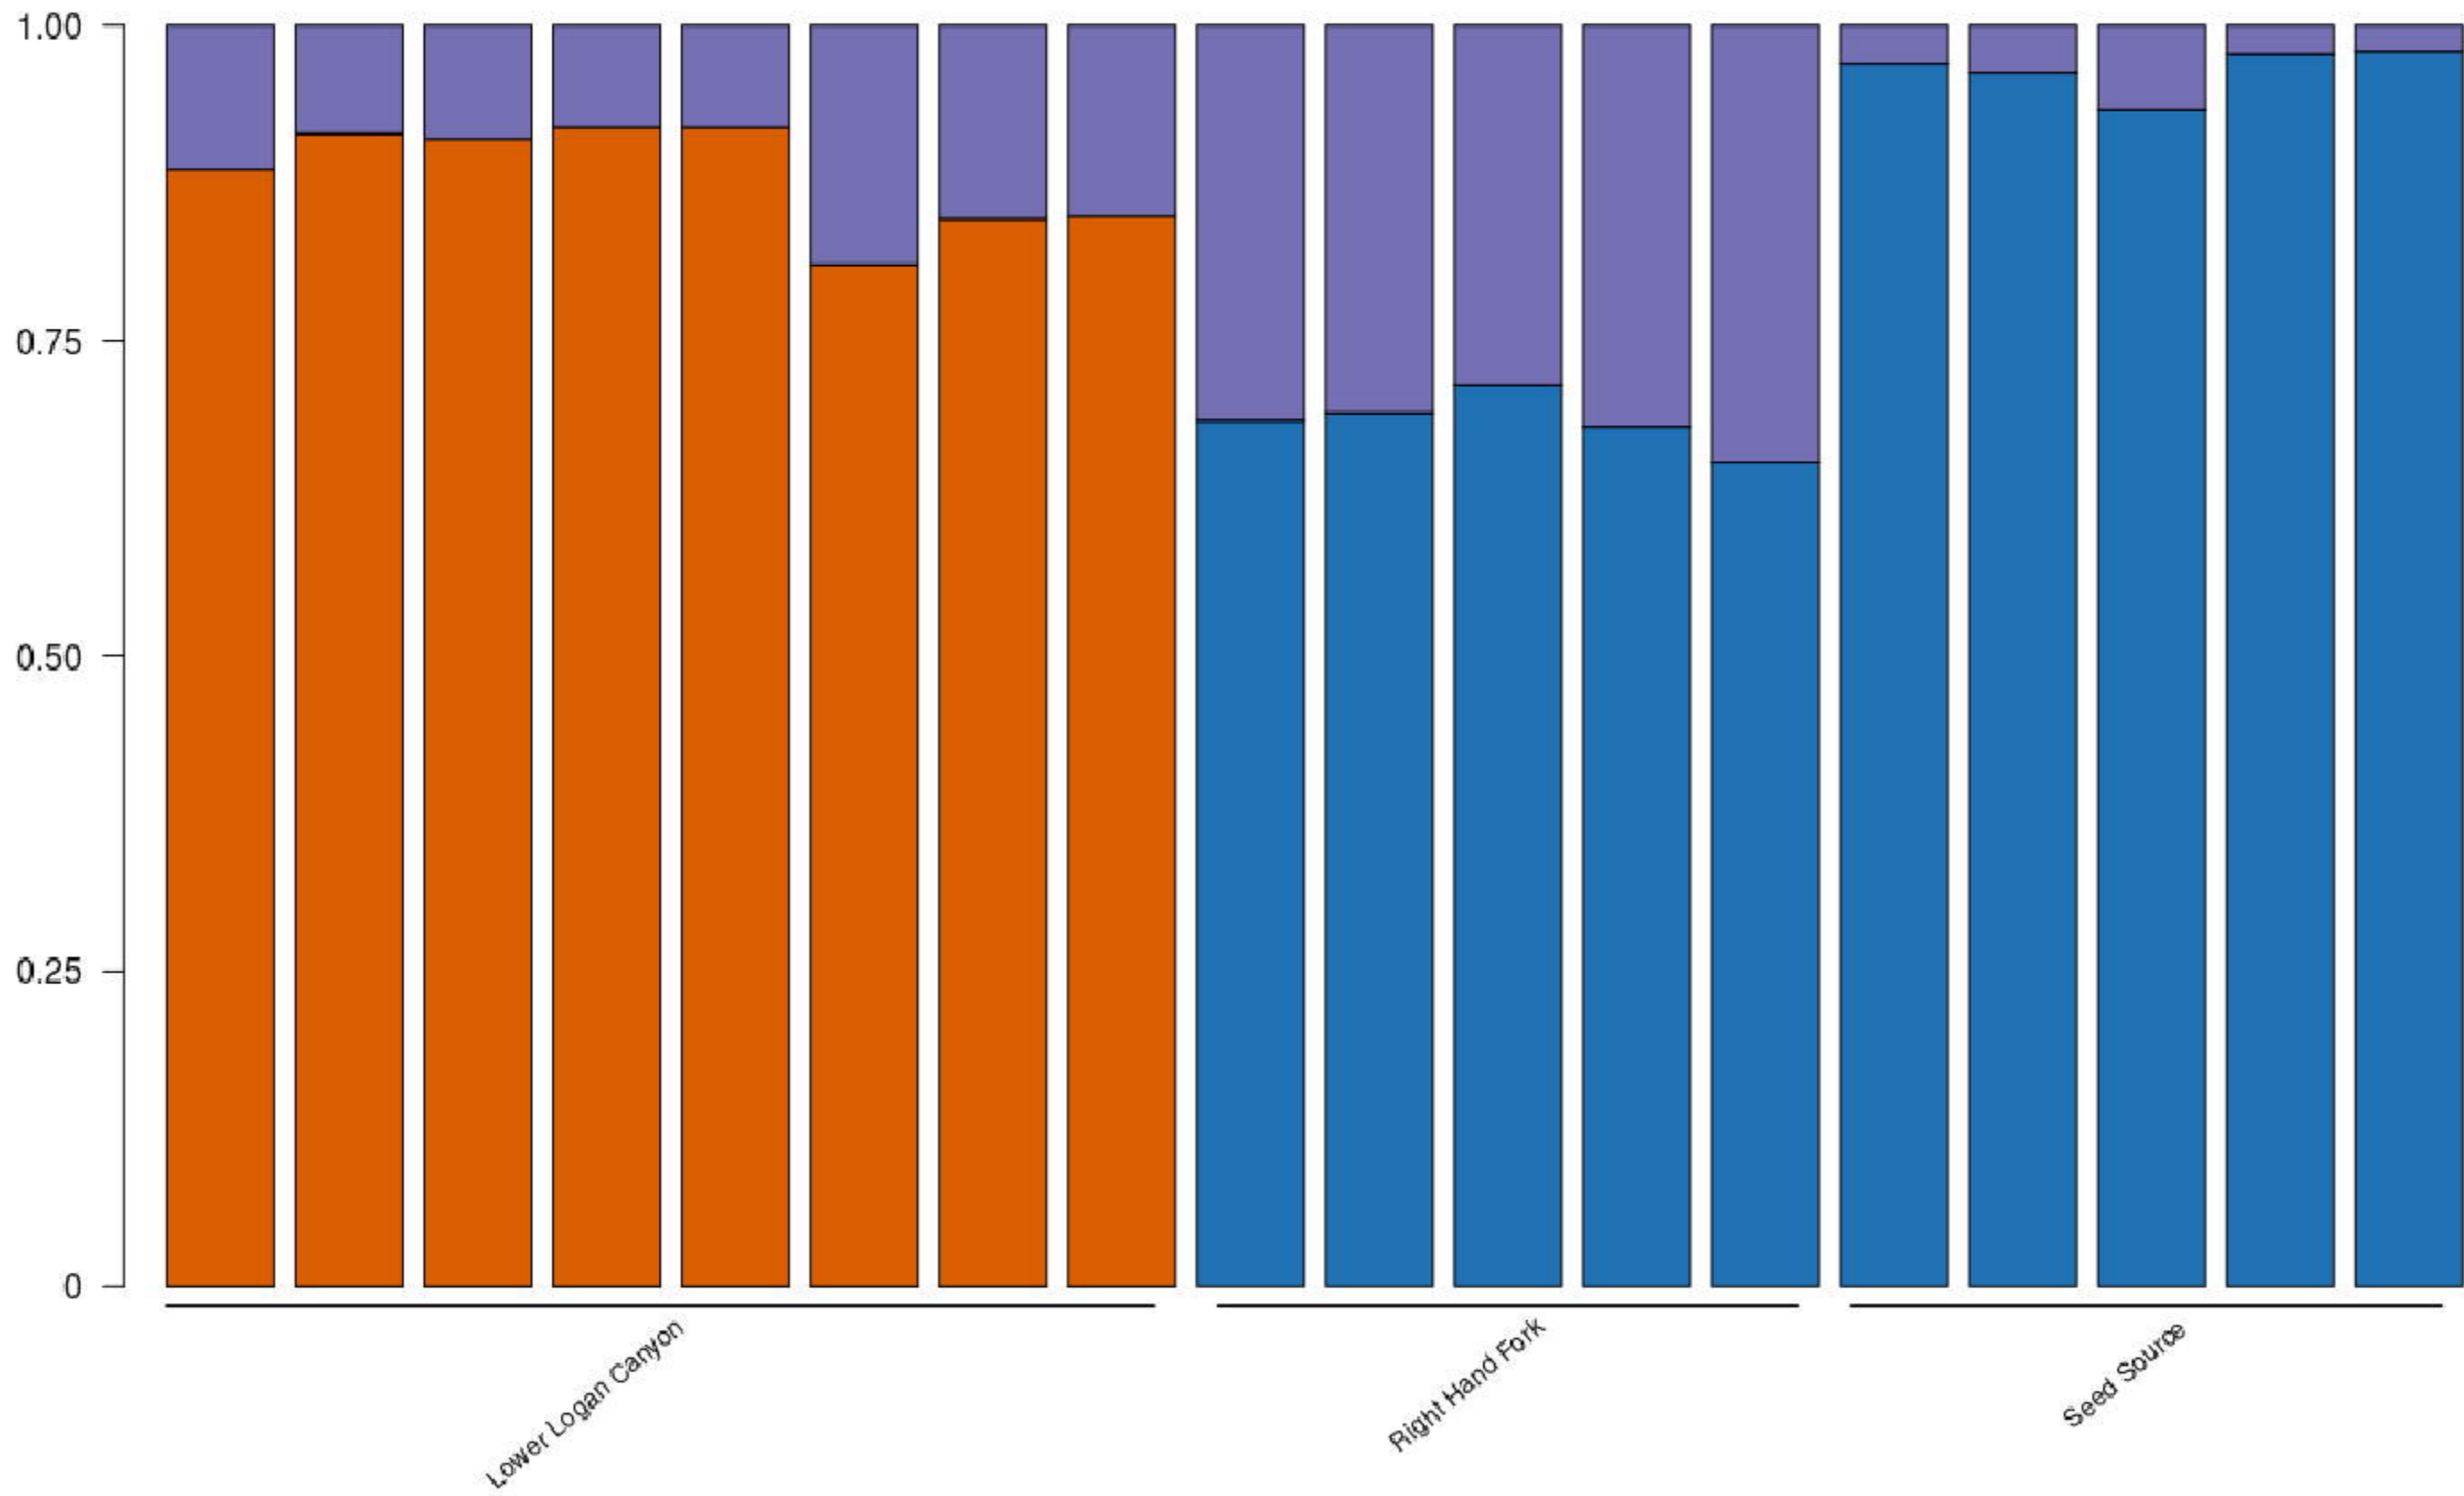

# Complex-Wide Jaccard Similarities

bioRxiv preprint doi: <https://doi.org/10.1101/2021.03.19.436082>; this version posted March 19, 2021. The copyright holder for this preprint (which was not certified by peer review) is the author/funder. All rights reserved. No reuse allowed without permission.

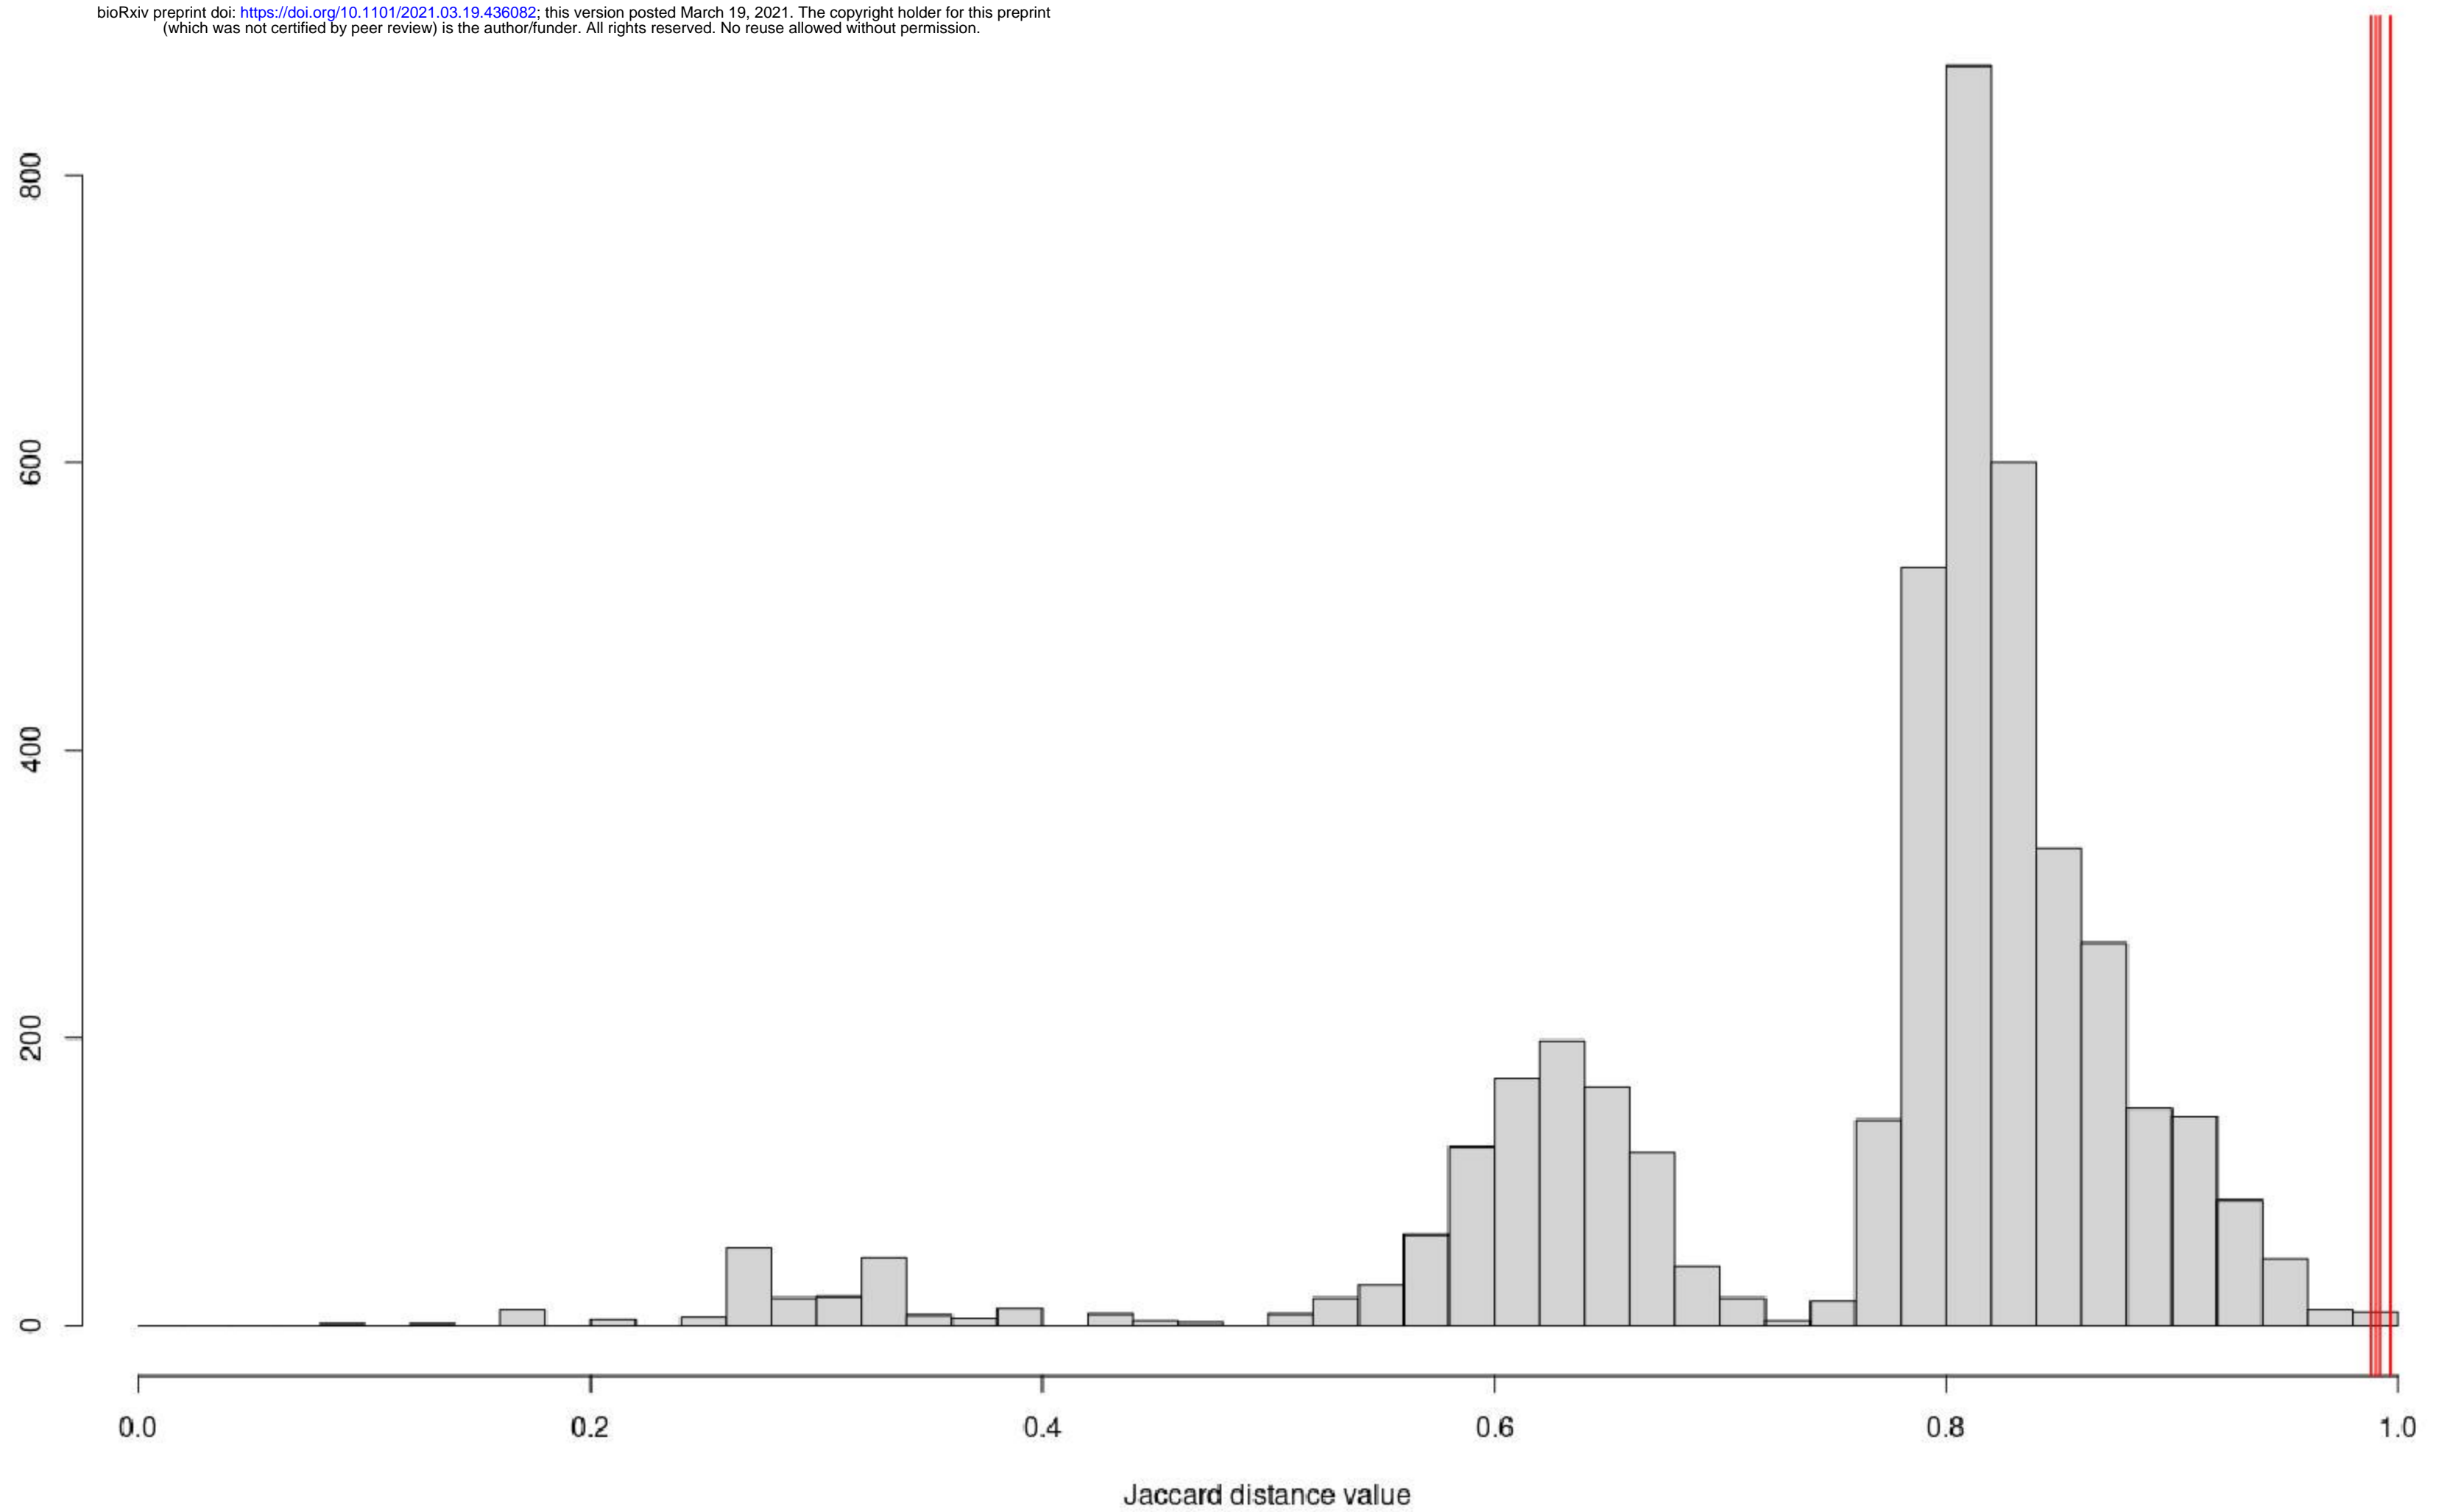

K = 2

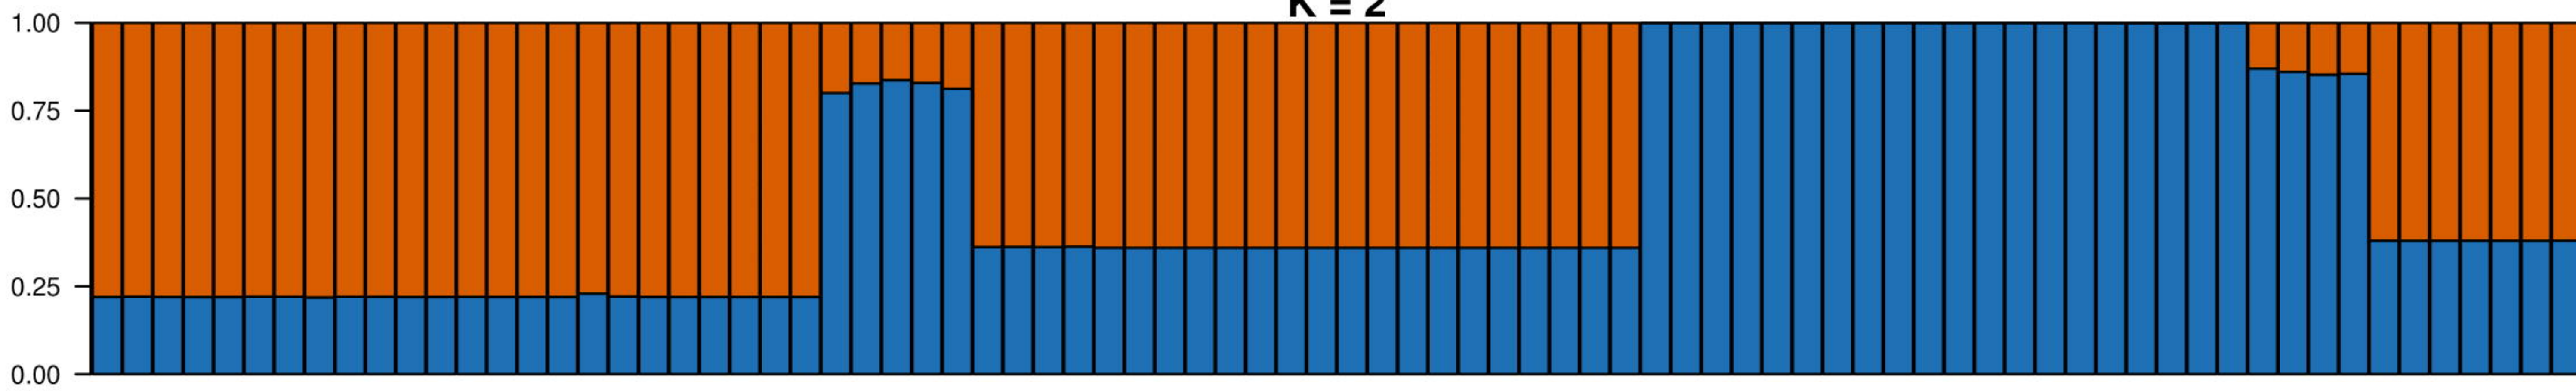

K = 3

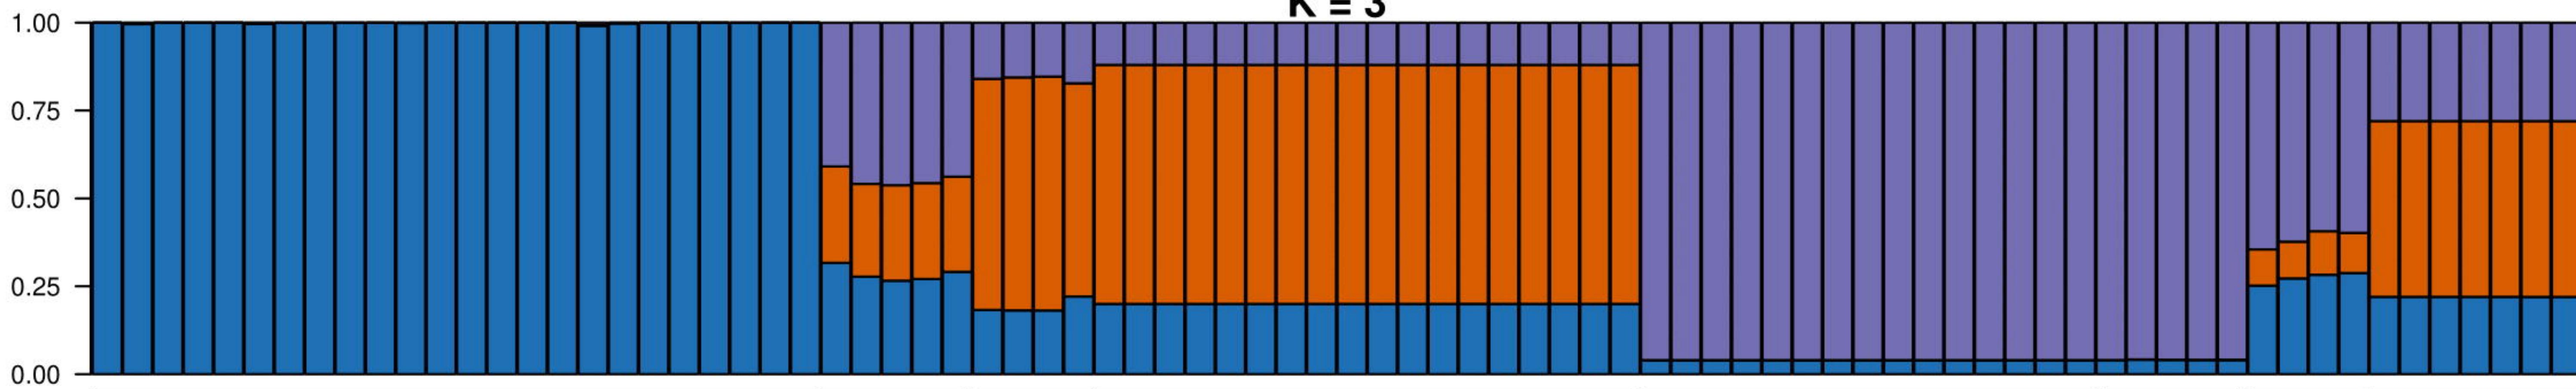

K = 4

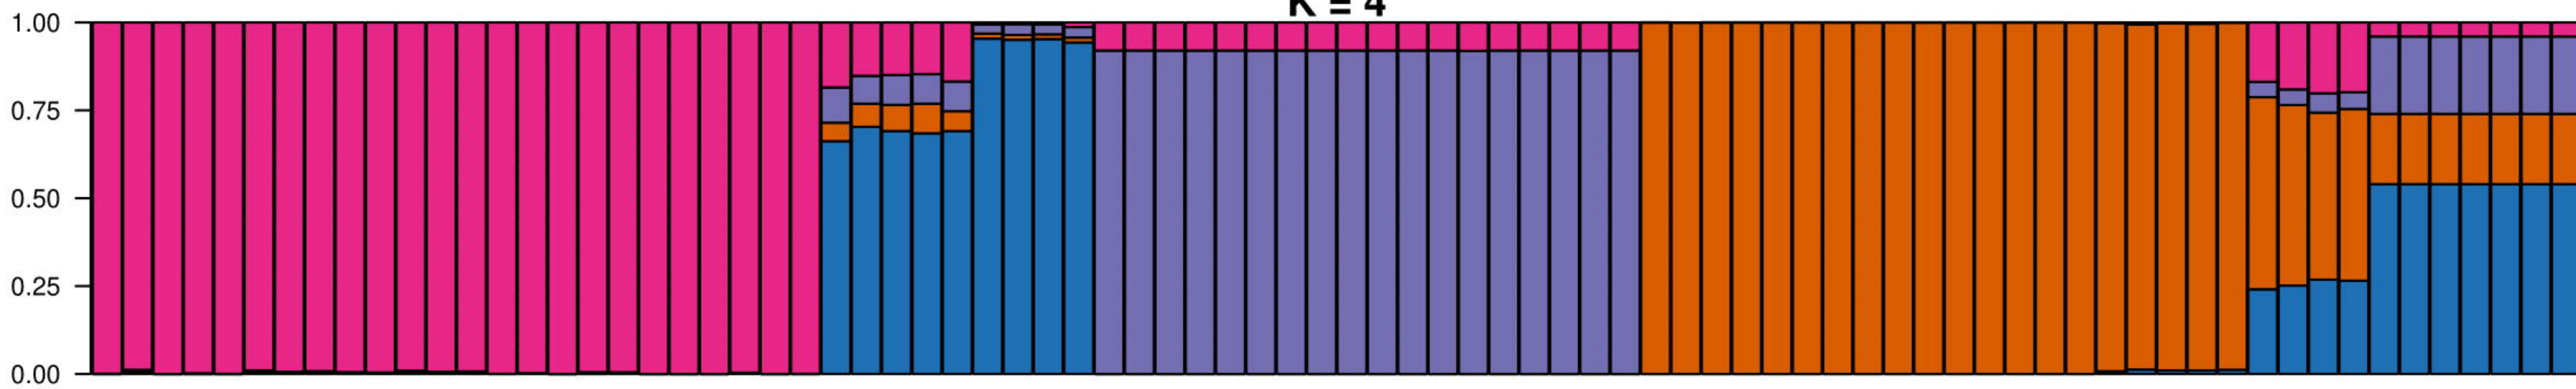

K = 5

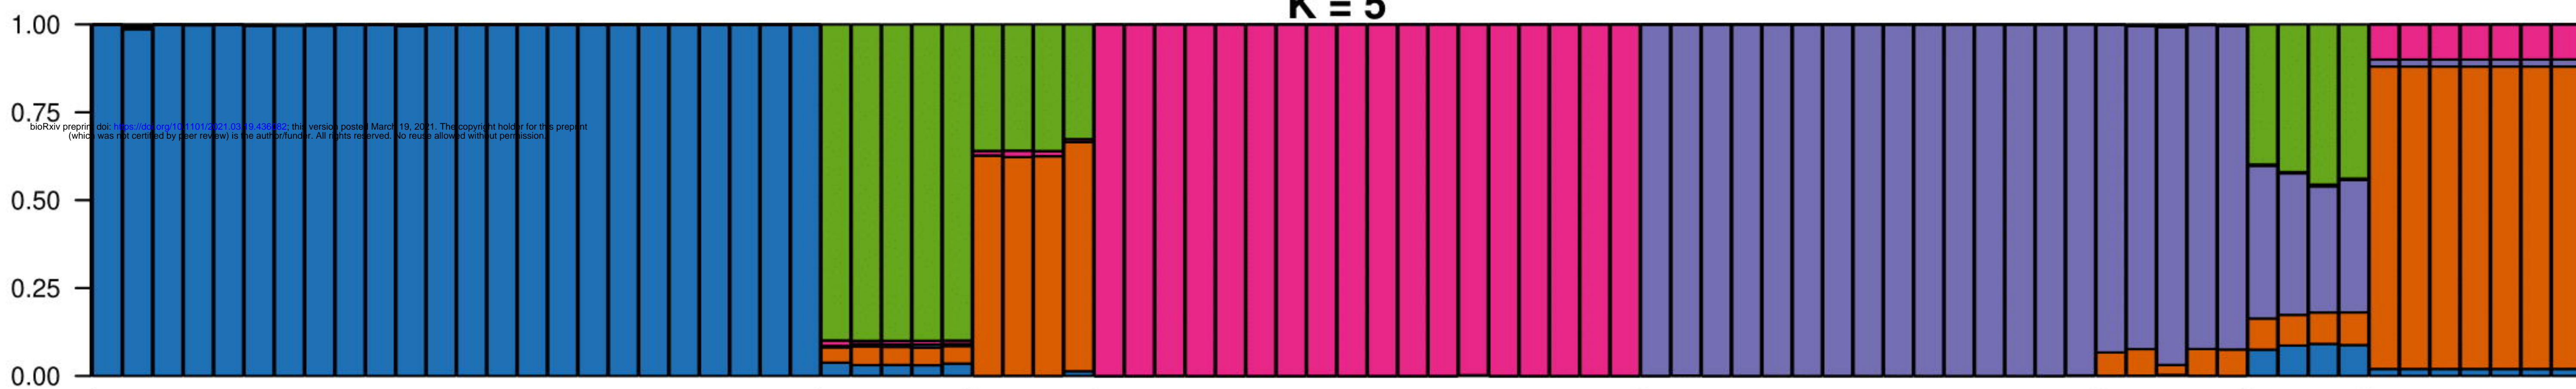

K = 6

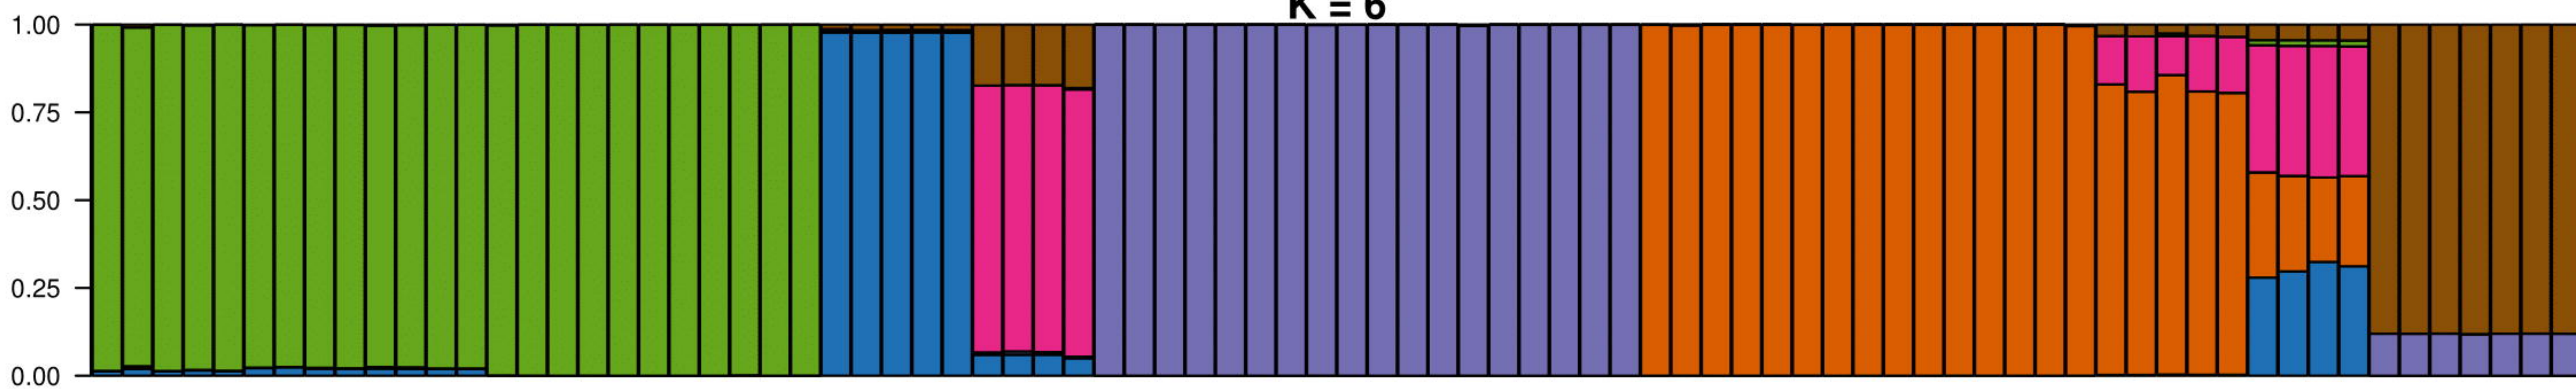

bioRxiv preprint doi: <https://doi.org/10.1101/097140>; this version posted March 19, 2011. The copyright holder for this preprint (which was not certified by peer review) is the author/funder. All rights reserved. No reuse allowed without permission.

ck\_Idaho

ck\_Jarbidge

ck\_Owyhee

maguirei

domensis

nv\_GRBA

nv\_Troy

parryi

K = 7

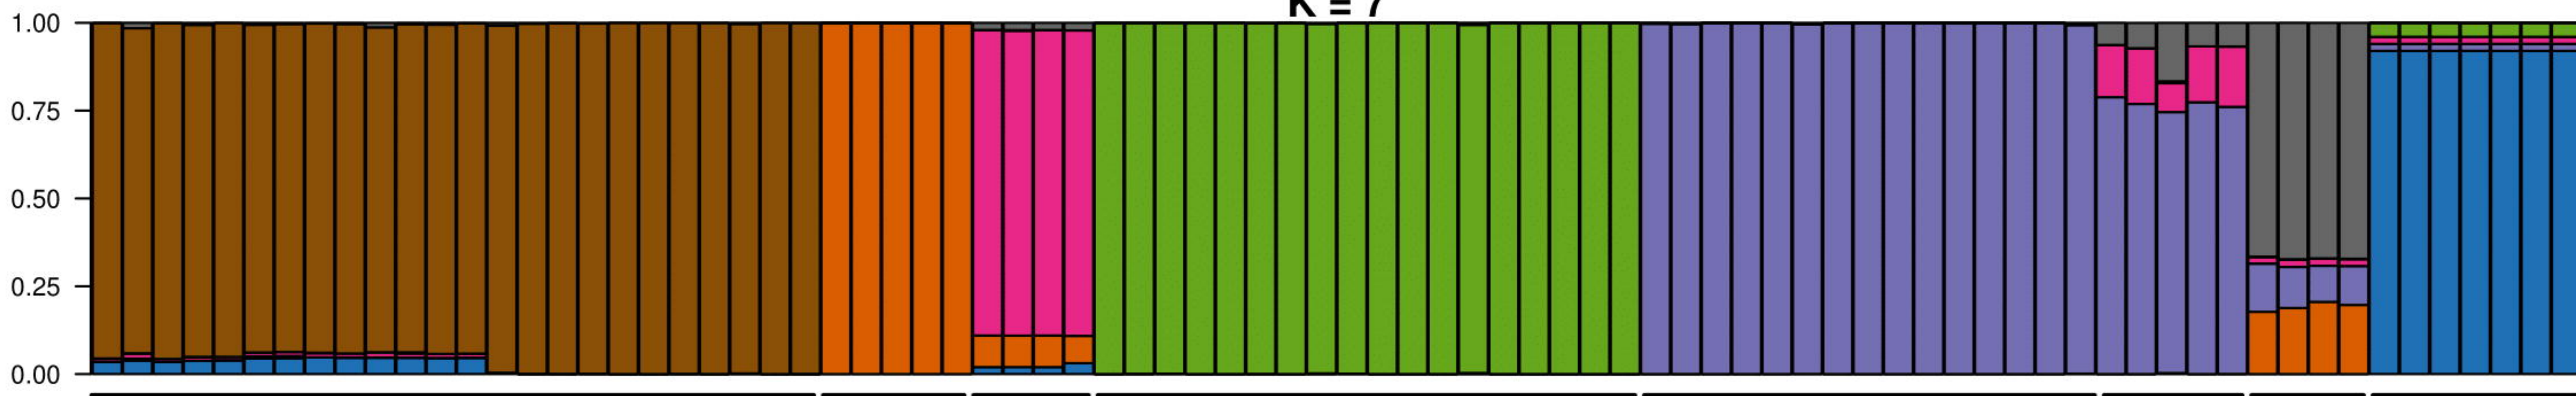

K = 8

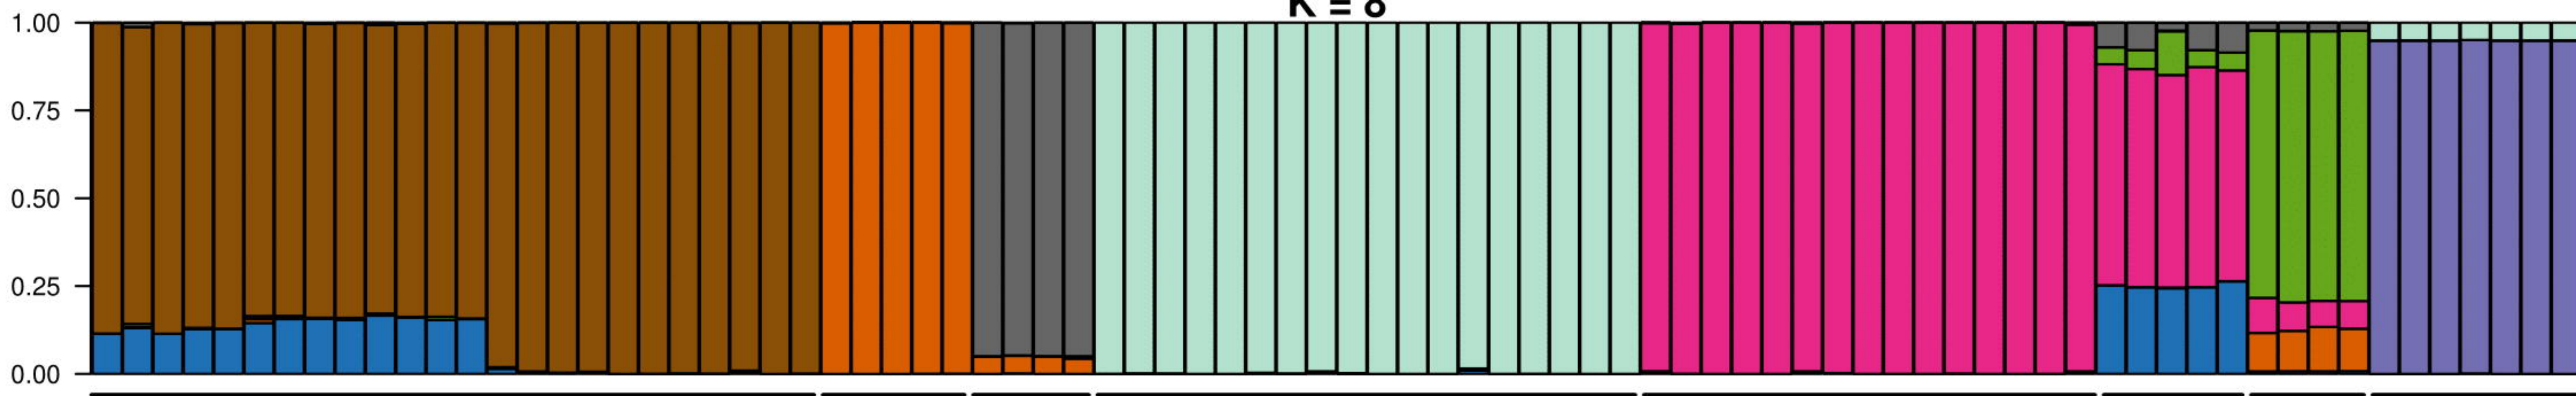

K = 9

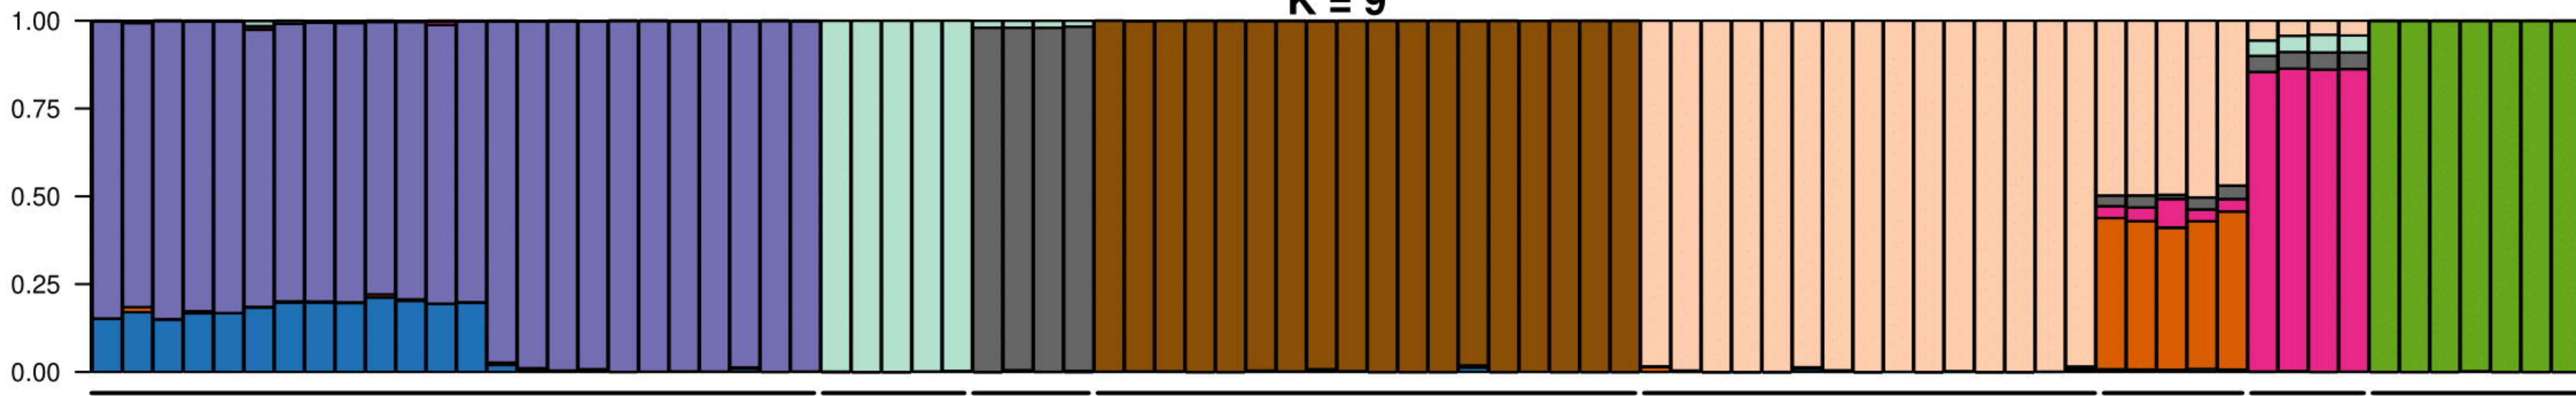

K = 10

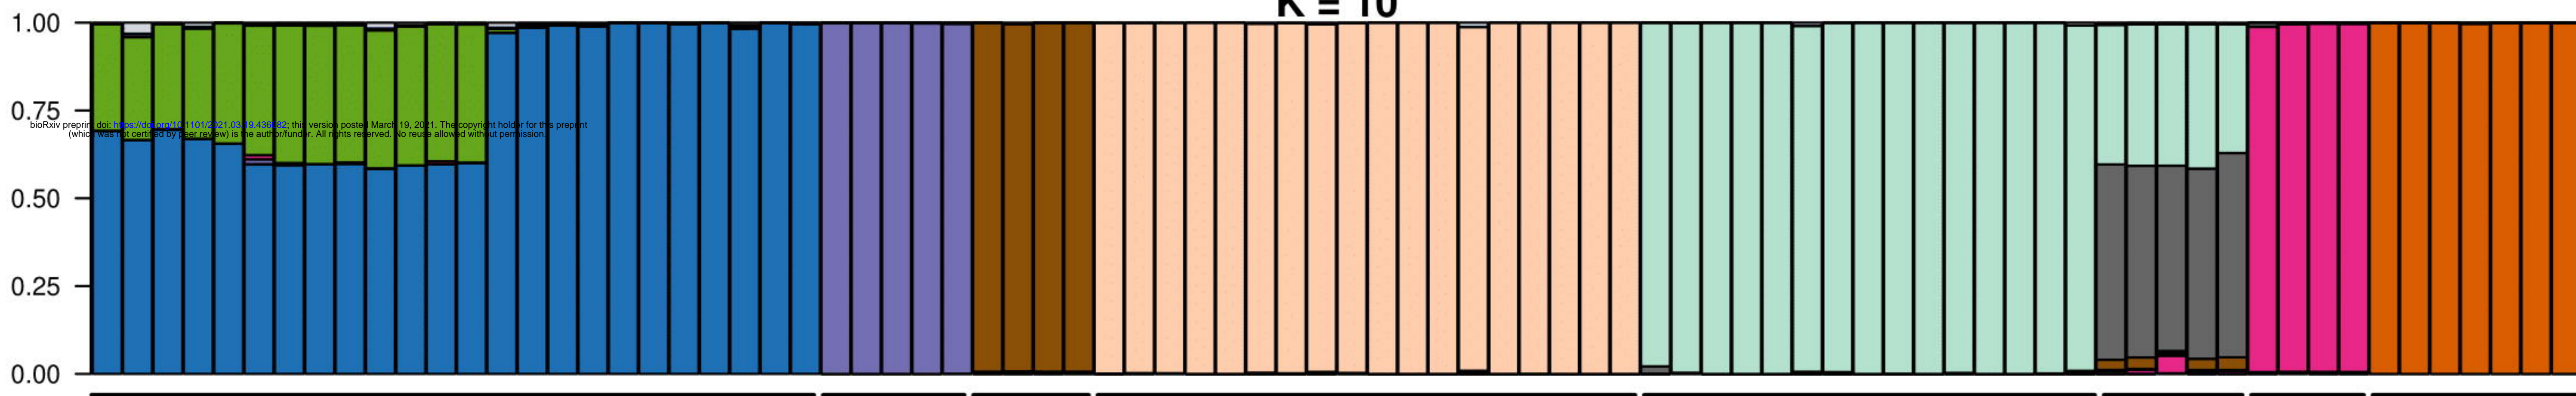

K = 11

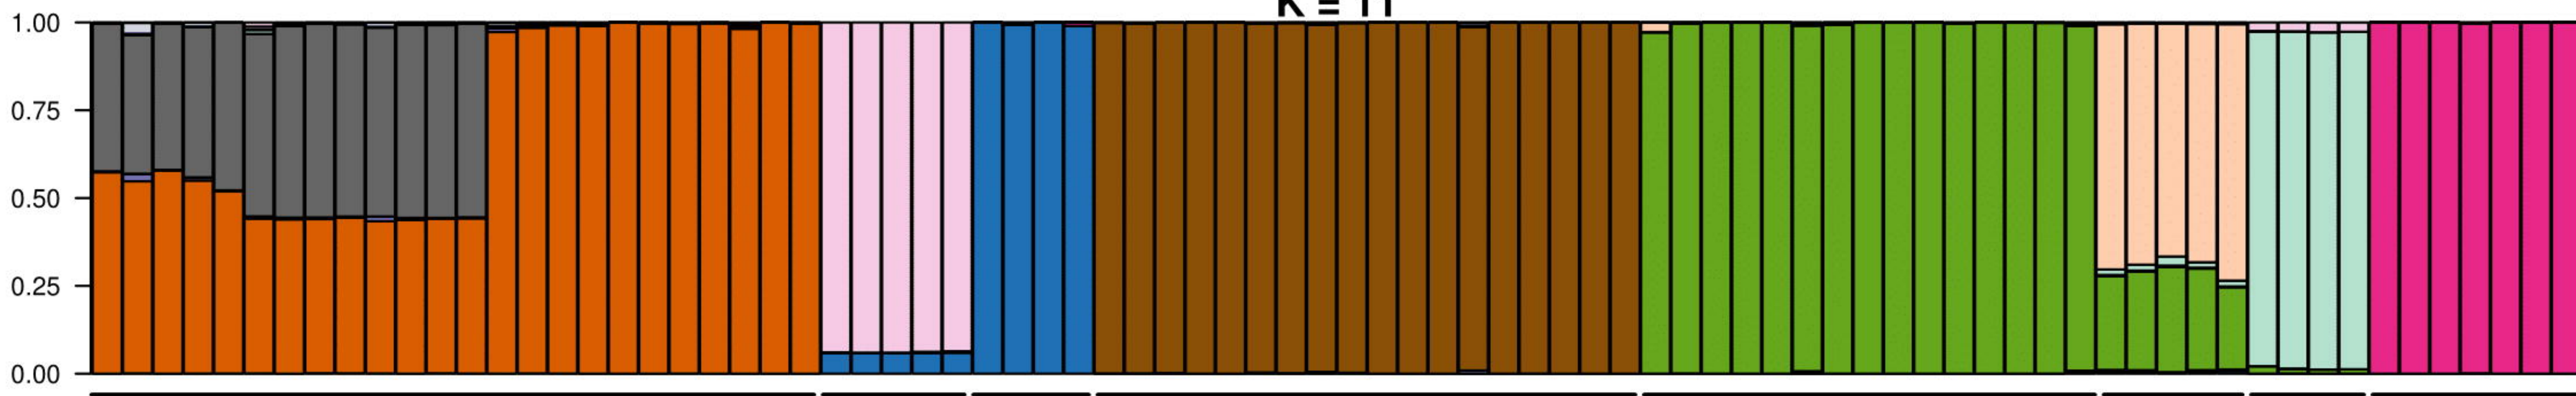

ck\_Idaho

ck\_Jarbidge

ck\_Owyhee

maguirei

domensis

nv\_GRBA

nv\_Troy

parryi

bioRxiv preprint doi: <https://doi.org/10.1101/057120>; this version posted March 19, 2011. The copyright holder for this preprint (which was not certified by peer review) is the author/funder. All rights reserved. No reuse allowed without permission.

K = 12

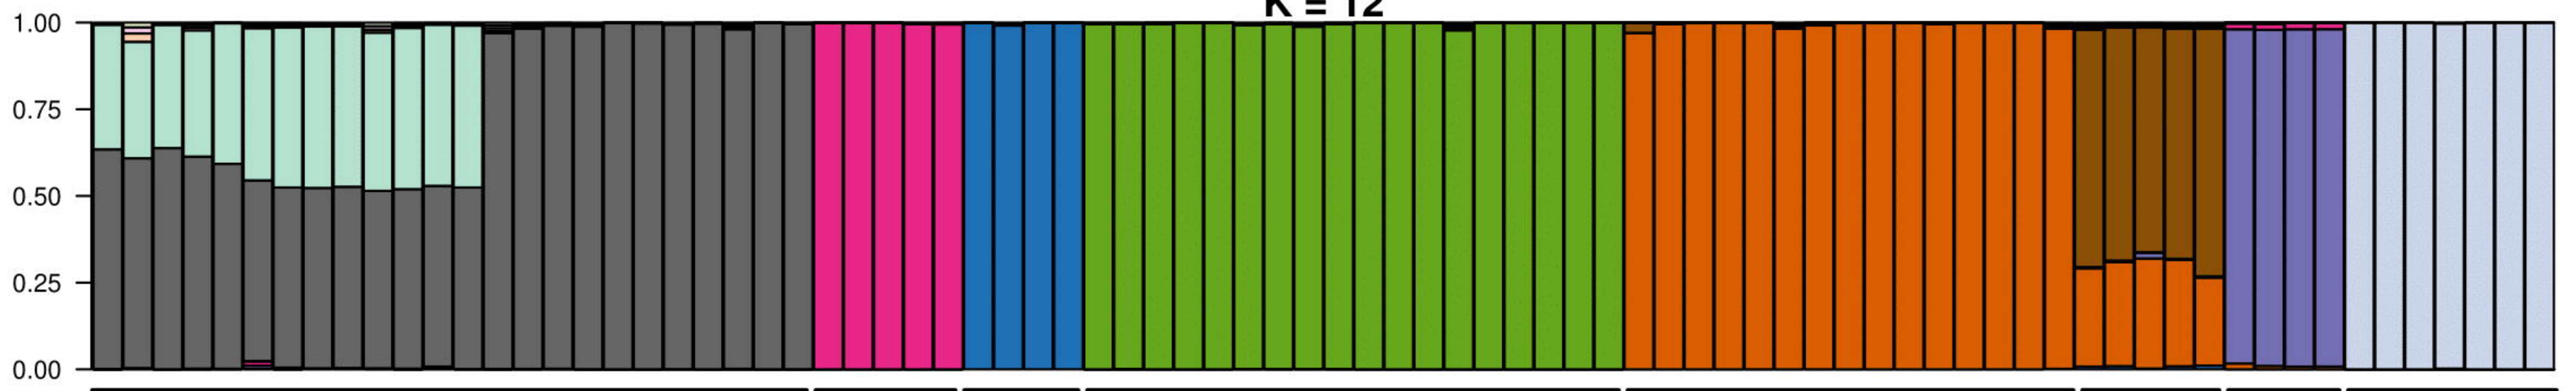

K = 13

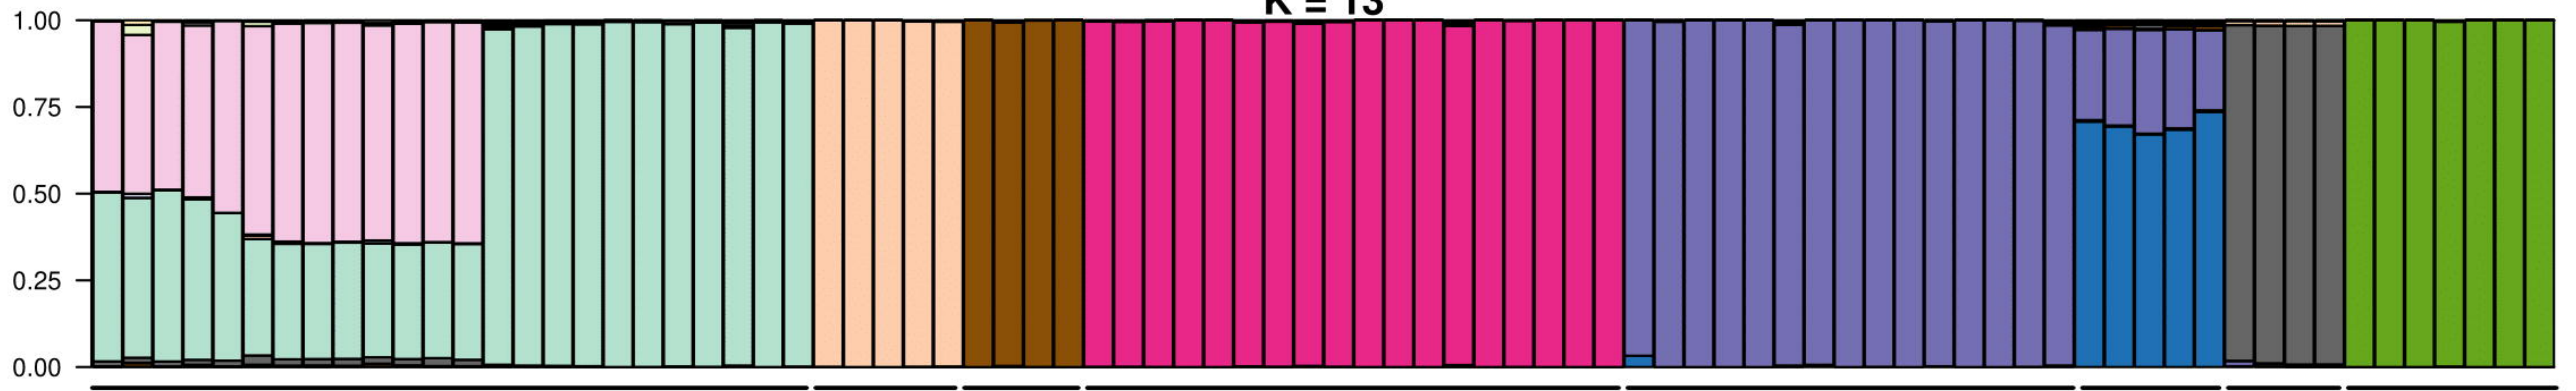

K = 14

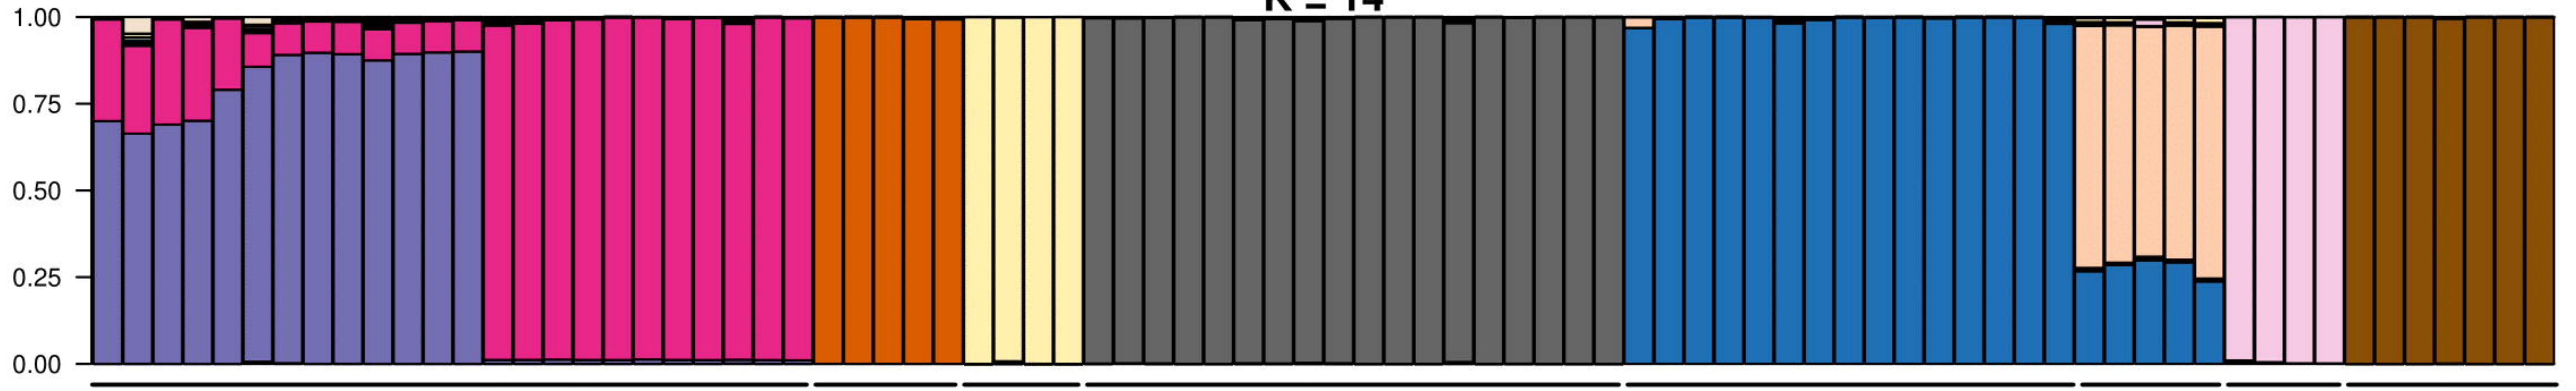

K = 15

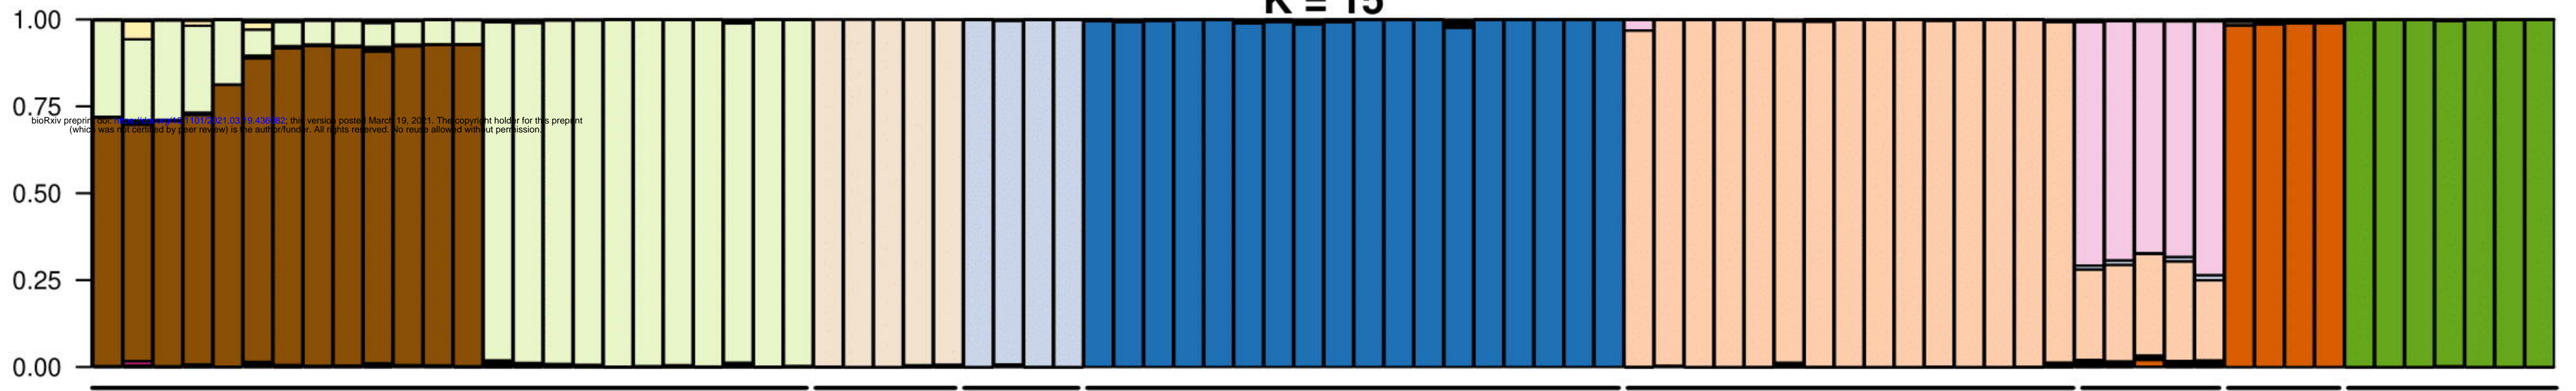

K = 16

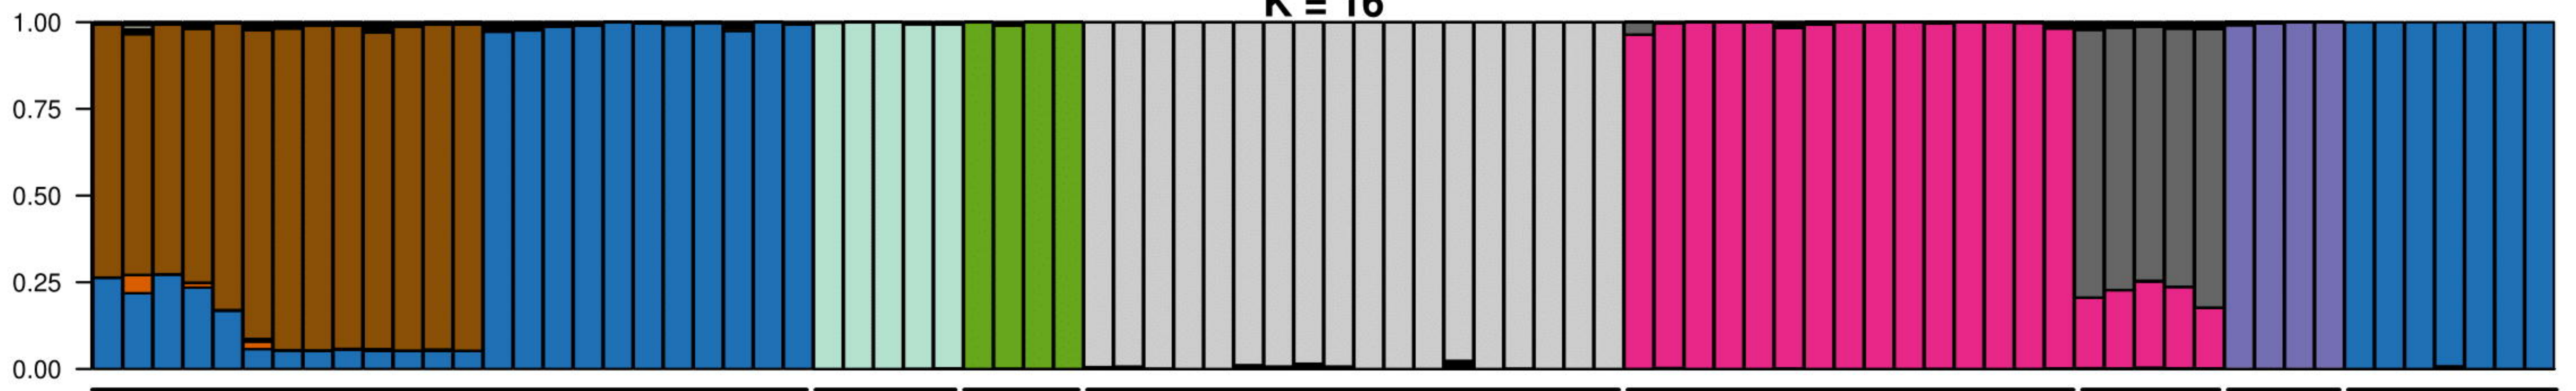

ck\_Idaho

ck\_Jarbridge

ck\_Owyhee

maguirei

domensis

nv\_GRBA

nv\_Troy

parryi

bioRxiv preprint doi: <https://doi.org/10.1101/2014.03.04.008000>; this version posted March 19, 2011. The copyright holder for this preprint (which was not certified by peer review) is the author/funder. All rights reserved. No reuse allowed without permission.
